# Supplementary material for: Microbial Communities, Metabolites, Fermentation Quality and Aerobic Stability of Whole-Plant Corn Silage Collected from Family Farms in Desert Steppe of North China
Source: MDPI journal article supplement (doi:10.3390/pr9050784), 2021-04-29
Supplement: s1 [file s1]

**Supplementary Table S1.** Relative concentration of metabolites detected in whole-plant corn silages (n = 3).

| No. | Items                                 | S1       | S2       | S3       | S4       |
|-----|---------------------------------------|----------|----------|----------|----------|
| 1   | 1,3-diaminopropane                    | 0.027967 | 4.95E-06 | 5.23E-07 | 1.16E-06 |
| 2   | 1,4-Cyclohexanedione 2                | 0.014689 | 0.214323 | 0.020613 | 1.16E-06 |
| 3   | 1,5-Anhydroglucitol                   | 0.031586 | 2.455797 | 0.278257 | 0.035192 |
| 4   | 1-Indanone 2                          | 0.371192 | 1.85087  | 0.3293   | 0.751943 |
| 5   | 1-Methylhydantoin 1                   | 0.382472 | 4.462688 | 0.447023 | 1.16E-06 |
| 6   | 1-Monopalmitin                        | 0.062384 | 0.756592 | 0.089665 | 0.199325 |
| 7   | 2,3-Dimethylsuccinic acid             | 0.021252 | 0.151095 | 0.011561 | 0.005792 |
| 8   | 2,6-Diaminopimelic acid 1             | 4.61E-07 | 0.083868 | 5.23E-07 | 1.16E-06 |
| 9   | 21-hydroxypregnenolone 2              | 0.009471 | 0.1255   | 0.005757 | 0.023828 |
| 10  | 24,25-dihydrolanosterol               | 0.411635 | 3.402826 | 0.320795 | 1.187049 |
| 11  | 2-amino-2-methylpropane-1,3-diol 1    | 0.014681 | 0.376484 | 0.024605 | 0.045075 |
| 12  | 2-Amino-3-methoxybenzoic acid 1       | 0.01314  | 0.215357 | 0.012736 | 0.02928  |
| 13  | 2-aminoethanethiol                    | 0.009059 | 4.95E-06 | 0.00194  | 1.16E-06 |
| 14  | 2-aminophenol 2                       | 0.050778 | 0.328657 | 0.010139 | 0.009768 |
| 15  | 2-Butyne-1,4-diol                     | 0.045386 | 0.475312 | 0.049318 | 0.034409 |
| 16  | 2-Deoxy-D-galactose 2                 | 0.035171 | 0.489035 | 0.070318 | 0.101958 |
| 17  | 2-deoxy-D-glucose 1                   | 0.249277 | 3.335831 | 0.400882 | 1.544032 |
| 18  | 2-Deoxyerythritol                     | 0.230995 | 3.453264 | 1.211853 | 0.099309 |
| 19  | 2-Deoxyuridine                        | 0.459514 | 4.667302 | 0.480847 | 1.16E-06 |
| 20  | 2-Furoic Acid                         | 0.273053 | 1.896762 | 0.18181  | 0.494838 |
| 21  | 2-hydroxy-3-isopropylbutanedioic acid | 0.213591 | 1.285793 | 0.140366 | 0.871868 |
| 22  | 2-hydroxybutanoic acid                | 0.026544 | 4.95E-06 | 0.033882 | 0.044972 |
| 23  | 2-hydroxypyridine                     | 2.91273  | 34.29957 | 3.560669 | 8.0289   |
| 24  | 2-Hydroxyvaleric acid                 | 0.281541 | 2.716512 | 0.257568 | 0.25337  |
| 25  | 2-ketoadipate 3                       | 0.018069 | 0.514464 | 0.004536 | 1.16E-06 |
| 26  | 2-ketobutyric acid 1                  | 0.004031 | 0.047207 | 0.005561 | 0.017897 |
| 27  | 2-keto-isovaleric acid 1              | 0.02002  | 0.327021 | 0.039723 | 0.104427 |
| 28  | 2-Keto-L-gulonic acid                 | 0.014805 | 0.418231 | 0.00867  | 1.16E-06 |
| 29  | 2-Ketovaleric acid 2                  | 0.003186 | 0.145251 | 5.23E-07 | 1.16E-06 |
| 30  | 2-methylfumarate                      | 0.001984 | 0.311772 | 0.016819 | 0.01452  |
| 31  | 3-(4-hydroxyphenyl)propionic acid     | 0.462317 | 6.293611 | 0.514851 | 1.16E-06 |
| 32  | 3,4-dihydroxybenzoic acid             | 0.077564 | 1.333258 | 0.086753 | 0.280151 |
| 33  | 3,4-dihydroxycinnamic acid            | 0.211551 | 1.007169 | 0.300646 | 0.080643 |
| 34  | 3,6-Anhydro-D-galactose 3             | 0.051077 | 4.95E-06 | 0.013528 | 1.16E-06 |
| 35  | 3-Aminoisobutyric acid 1              | 0.052562 | 0.580673 | 0.050916 | 0.130889 |
| 36  | 3-Cyanoalanine                        | 0.051327 | 0.539866 | 0.038552 | 0.032739 |
| 37  | 3-hydroxy-3-methylglutaric acid       | 0.094582 | 0.957947 | 0.08736  | 0.340352 |
| 38  | 3-hydroxybutyric acid                 | 0.286325 | 0.900873 | 0.139843 | 0.699629 |
| 39  | 3-Hydroxypropionic acid 1             | 0.10846  | 0.257366 | 0.030975 | 0.162797 |
| 40  | 3-hydroxypyruvate                     | 0.049438 | 0.248406 | 5.23E-07 | 0.039072 |

|    |                                                |          |          |          |          |
|----|------------------------------------------------|----------|----------|----------|----------|
| 41 | 3-Methylamino-1,2-propanediol 2                | 0.079635 | 1.348409 | 0.13193  | 1.16E-06 |
| 42 | 3-Methylglutaric Acid                          | 0.053185 | 0.563409 | 0.095421 | 0.1082   |
| 43 | 3-Methyloxindole 2                             | 4.61E-07 | 4.040427 | 0.445038 | 2.087826 |
| 44 | 3-Phenyllactic acid                            | 0.583001 | 6.086227 | 0.310837 | 2.518906 |
| 45 | 4',5-dihydroxy-7-methoxyisoflavone             | 4.61E-07 | 0.02099  | 0.004178 | 0.011421 |
| 46 | 4-Acetamidobutyric acid 2                      | 0.014685 | 0.167287 | 0.014386 | 1.16E-06 |
| 47 | 4-Acetylbutyric acid 1                         | 0.003242 | 4.95E-06 | 5.23E-07 | 0.002258 |
| 48 | 4-aminobutyric acid 1                          | 41.047   | 222.0208 | 17.12807 | 39.8366  |
| 49 | 4-hydroxy-3-methoxybenzoic acid;               | 0.180251 | 1.473987 | 0.162985 | 0.656881 |
| 50 | 4-Hydroxy-6-methyl-2-pyrone                    | 0.158002 | 1.634483 | 0.136708 | 0.450669 |
| 51 | 4-Hydroxybenzoic acid                          | 0.239734 | 1.436326 | 0.104831 | 0.664387 |
| 52 | 4-hydroxybutyrate                              | 0.064451 | 4.95E-06 | 0.294492 | 1.16E-06 |
| 53 | 4-hydroxycinnamic acid                         | 1.03109  | 7.839479 | 0.912968 | 1.16E-06 |
| 54 | 4-Hydroxycyclohexanecarboxylic acid            | 0.068491 | 0.474637 | 0.058597 | 1.16E-06 |
| 55 | 4-Hydroxymethyl-3-methoxyphenoxyacetic acid    | 0.143883 | 1.117287 | 0.034409 | 1.16E-06 |
| 56 | 4-hydroxyphenylacetic acid                     | 0.043421 | 4.95E-06 | 0.008863 | 0.154709 |
| 57 | 4-Hydroxyphenylethanol                         | 0.045263 | 0.206326 | 0.050516 | 0.11764  |
| 58 | 4-HYDROXYPYRIDINE                              | 0.112607 | 0.919385 | 0.098379 | 0.244142 |
| 59 | 4-Methyl-5-thiazolethanol                      | 4.61E-07 | 0.155874 | 0.026825 | 0.064923 |
| 60 | 5,7-dihydroxy-3-(4-methoxyphenyl)chromen-4-one | 0.001782 | 0.021111 | 5.23E-07 | 0.006634 |
| 61 | 5-Aminoimidazole-4-carboxamide 2               | 0.001027 | 0.045796 | 0.003996 | 1.16E-06 |
| 62 | 5-aminovaleric acid lactam                     | 1.994746 | 7.325618 | 0.556471 | 1.16E-06 |
| 63 | 5-Dihydrocortisol 1                            | 0.002581 | 0.193368 | 0.01373  | 0.006432 |
| 64 | 6-phosphogluconic acid                         | 0.046828 | 0.275461 | 0.08018  | 1.16E-06 |
| 65 | 9-Fluorenone 1                                 | 4.61E-07 | 0.148864 | 0.001313 | 0.008886 |
| 66 | Acetol 5                                       | 0.089322 | 0.915504 | 0.102845 | 0.375379 |
| 67 | Aconitic Acid                                  | 0.502318 | 4.477263 | 0.00748  | 0.011832 |
| 68 | adenine                                        | 0.083392 | 2.91929  | 0.50898  | 0.757937 |
| 69 | alanine 1                                      | 9.54671  | 301.33   | 32.58378 | 1.16E-06 |
| 70 | Aldosterone 1                                  | 0.00909  | 0.075675 | 0.009759 | 0.002984 |
| 71 | alpha-D-glucosamine 1-phosphate                | 0.007581 | 0.51788  | 0.03072  | 0.018762 |
| 72 | alpha-ketoisocaproic acid 1                    | 4.61E-07 | 0.164041 | 0.008471 | 1.16E-06 |
| 73 | alpha-Santonin 1                               | 0.003213 | 0.06972  | 0.007369 | 0.007485 |
| 74 | Aminomalonic acid                              | 0.020107 | 1.085123 | 0.033142 | 0.235546 |
| 75 | Aminoxyacetic acid                             | 0.004218 | 0.036683 | 0.00032  | 0.001509 |
| 76 | androsterone 1                                 | 0.018726 | 0.141201 | 0.023599 | 0.081648 |
| 77 | Arachidic acid                                 | 0.064011 | 0.72936  | 0.099022 | 0.277595 |
| 78 | arachidonic acid                               | 0.012269 | 0.170764 | 0.007135 | 1.16E-06 |
| 79 | asparagine 4                                   | 4.61E-07 | 1.33511  | 0.086506 | 0.118754 |
| 80 | aspartic acid 1                                | 2.303451 | 16.16703 | 0.953763 | 5.494171 |
| 81 | aspartic acid 2                                | 0.108476 | 0.726306 | 0.097621 | 0.149636 |
| 82 | Atrazine-2-hydroxy 4                           | 0.040277 | 0.876174 | 0.086312 | 0.309518 |

|     |                                  |          |          |          |          |
|-----|----------------------------------|----------|----------|----------|----------|
| 83  | azelaic acid                     | 0.0177   | 0.352852 | 0.029176 | 0.097552 |
| 84  | Behenic acid                     | 0.019643 | 0.267177 | 0.022805 | 0.069807 |
| 85  | benzoic acid                     | 0.044322 | 0.53364  | 0.047501 | 0.037532 |
| 86  | beta-Alanine 2                   | 0.115815 | 1.149125 | 0.129677 | 0.051954 |
| 87  | beta-hydroxypyruvate             | 0.014217 | 0.122902 | 0.009355 | 0.008225 |
| 88  | beta-Mannosylglycerate 1         | 0.230548 | 3.570403 | 0.297561 | 0.071168 |
| 89  | canavanine degr prod             | 0.051808 | 0.733532 | 0.077454 | 0.0295   |
| 90  | caprylic acid                    | 0.033754 | 0.047861 | 0.038229 | 0.039453 |
| 91  | Carbobenzyloxy-L-leucine degr2   | 0.018745 | 0.231009 | 0.026641 | 0.027008 |
| 92  | cellobiose 2                     | 4.61E-07 | 4.95E-06 | 5.23E-07 | 1.16E-06 |
| 93  | Cellobiotol                      | 0.036351 | 0.10136  | 0.005509 | 0.031861 |
| 94  | Cerotinic acid                   | 0.026123 | 0.285615 | 0.022947 | 0.045847 |
| 95  | Cholestane-3,5,6-triol, (3?5?6?- | 1.512507 | 10.5088  | 1.566374 | 2.804778 |
| 96  | Cholesterol-2,2,3,4,4,6-d6       | 4.61E-07 | 0.706205 | 0.062903 | 0.022804 |
| 97  | cis-gondoic acid                 | 0.095304 | 0.824198 | 0.161738 | 1.16E-06 |
| 98  | Citraconic acid 2                | 0.00229  | 0.027194 | 5.23E-07 | 1.16E-06 |
| 99  | Citramalic acid                  | 0.086792 | 0.272455 | 0.014308 | 0.105676 |
| 100 | citrulline 2                     | 0.186566 | 2.268539 | 0.208916 | 0.640746 |
| 101 | conduritol b epoxide 2           | 0.014855 | 4.95E-06 | 5.23E-07 | 6.36E-05 |
| 102 | Cortexolone 3                    | 0.022043 | 0.390379 | 0.00689  | 0.052589 |
| 103 | Corticosterone 4                 | 0.005947 | 0.093023 | 0.00722  | 1.16E-06 |
| 104 | cycloleucine 2                   | 0.421146 | 4.123631 | 0.460369 | 0.221454 |
| 105 | Cysteinylglycine 1               | 0.002923 | 0.009138 | 0.002627 | 1.16E-06 |
| 106 | cytidine-monophosphate degr prod | 0.00165  | 0.001674 | 0.000831 | 1.16E-06 |
| 107 | Cytosin                          | 0.002171 | 0.595746 | 0.071267 | 0.058239 |
| 108 | D-(glycerol 1-phosphate)         | 4.61E-07 | 0.007852 | 0.000608 | 1.16E-06 |
| 109 | D-alanyl-D-alanine 2             | 0.021865 | 4.95E-06 | 5.23E-07 | 1.16E-06 |
| 110 | D-Arabitol                       | 0.053312 | 0.677788 | 0.106201 | 0.126894 |
| 111 | D-erythronolactone 2             | 0.021155 | 1.091703 | 0.097371 | 0.042272 |
| 112 | D-erythro-sphingosine 1          | 0.006787 | 0.042397 | 0.004679 | 0.002763 |
| 113 | D-galacturonic acid 2            | 0.023002 | 1.046271 | 0.07923  | 1.16E-06 |
| 114 | d-Glucoheptose 1                 | 0.015626 | 2.012425 | 0.184902 | 0.334474 |
| 115 | D-Glyceric acid                  | 2.114059 | 31.28666 | 2.523198 | 1.16E-06 |
| 116 | Digitoxose 1                     | 0.536532 | 2.485821 | 0.38543  | 0.918701 |
| 117 | Diglycerol 1                     | 0.097607 | 0.827328 | 0.159587 | 0.314401 |
| 118 | Dihydroxyacetone                 | 0.028625 | 4.95E-06 | 0.207082 | 1.16E-06 |
| 119 | dl-p-Hydroxyphenyllactic acid    | 0.134286 | 1.162607 | 0.177361 | 0.657603 |
| 120 | Elaidic acid                     | 0.06226  | 0.342754 | 0.07847  | 0.16641  |
| 121 | Epigallocatechin                 | 0.01853  | 0.147708 | 0.015334 | 0.029991 |
| 122 | Ergosterol                       | 0.178408 | 1.366139 | 0.168316 | 0.536564 |
| 123 | Ethanolamine                     | 4.134206 | 37.87669 | 3.869613 | 4.382333 |
| 124 | ferulic acid                     | 1.308238 | 10.47189 | 1.125726 | 0.150986 |

|     |                               |          |          |          |          |
|-----|-------------------------------|----------|----------|----------|----------|
| 125 | Flavanone 1                   | 0.011237 | 0.074157 | 0.012275 | 0.019122 |
| 126 | flavin adenine degrad product | 0.595948 | 33.94597 | 3.646087 | 0.323502 |
| 127 | fructose 2                    | 3.757961 | 3.34413  | 7.869695 | 0.557113 |
| 128 | fructose-6-phosphate          | 0.01603  | 0.019105 | 0.00349  | 0.003515 |
| 129 | fucose 1                      | 0.445582 | 4.332457 | 0.334804 | 2.01203  |
| 130 | Galactinol 1                  | 4.61E-07 | 4.95E-06 | 5.23E-07 | 1.16E-06 |
| 131 | Galactonic acid               | 4.61E-07 | 23.00615 | 0.20907  | 3.053524 |
| 132 | galactose 2                   | 0.065282 | 0.560345 | 0.005386 | 1.16E-06 |
| 133 | Gallic acid                   | 0.038917 | 0.405927 | 0.037067 | 1.16E-06 |
| 134 | Gentiobiose 2                 | 0.286436 | 0.914126 | 0.072033 | 1.769182 |
| 135 | gentisic acid                 | 0.018361 | 0.171846 | 0.026094 | 1.16E-06 |
| 136 | Glucoheptonic acid 1          | 0.932079 | 16.85242 | 0.988861 | 1.071915 |
| 137 | gluconic acid 1               | 0.249175 | 0.590044 | 0.121794 | 0.002835 |
| 138 | Glucosaminic acid             | 0.001134 | 0.072911 | 0.002189 | 0.019035 |
| 139 | glucose 1                     | 9.221789 | 6.660697 | 2.568665 | 0.118005 |
| 140 | glucose-6-phosphate 1         | 0.085744 | 4.95E-06 | 5.23E-07 | 1.16E-06 |
| 141 | Glutaconic acid               | 0.011287 | 0.102405 | 0.00711  | 0.017072 |
| 142 | glutamic acid                 | 0.15931  | 1.110367 | 0.159546 | 0.131327 |
| 143 | glutaraldehyde 2              | 1.24207  | 16.48865 | 2.465888 | 5.758595 |
| 144 | Glutaric Acid                 | 0.417564 | 4.776589 | 0.371718 | 0.571906 |
| 145 | glutathione 1                 | 0.166919 | 2.407114 | 0.361814 | 0.089197 |
| 146 | glycerol                      | 17.33881 | 179.8441 | 13.32352 | 23.97507 |
| 147 | glycine 1                     | 0.783924 | 1.059744 | 0.120356 | 1.16E-06 |
| 148 | glycine 2                     | 3.657742 | 51.7541  | 5.276793 | 9.829817 |
| 149 | glycocyamine 3                | 4.61E-07 | 4.95E-06 | 5.23E-07 | 1.16E-06 |
| 150 | glycolic acid                 | 0.724714 | 5.111301 | 0.558188 | 1.308194 |
| 151 | gly-pro                       | 4.61E-07 | 4.95E-06 | 5.23E-07 | 1.16E-06 |
| 152 | Guanidinosuccinic acid 3      | 0.067585 | 0.673529 | 0.052387 | 0.106214 |
| 153 | guanine 1                     | 0.218782 | 1.703861 | 0.218471 | 0.471778 |
| 154 | heptadecanoic acid            | 0.044748 | 0.365007 | 0.035746 | 0.0797   |
| 155 | Hesperitin 2                  | 0.000128 | 0.075893 | 0.000715 | 1.16E-06 |
| 156 | hexadecane                    | 0.085055 | 0.674971 | 0.082065 | 0.3467   |
| 157 | hydroquinone                  | 0.016532 | 0.055543 | 0.007389 | 0.021266 |
| 158 | hydroxylamine                 | 4.61E-07 | 31.91204 | 2.637362 | 6.606393 |
| 159 | hydroxyurea                   | 0.035098 | 0.479658 | 0.146696 | 0.253015 |
| 160 | hypoxanthine 1                | 0.172126 | 2.839716 | 0.205751 | 0.524179 |
| 161 | indole-3-acetamide 4          | 0.001118 | 0.008681 | 0.001889 | 0.003715 |
| 162 | indole-3-acetic acid          | 0.149376 | 0.633308 | 5.23E-07 | 0.035275 |
| 163 | isocitric acid 2              | 0.951802 | 9.690838 | 1.282981 | 1.991604 |
| 164 | Isoleucine 1                  | 0.350766 | 4.419154 | 0.652842 | 1.363019 |
| 165 | Isoleucine 2                  | 2.300765 | 115.5476 | 9.971842 | 26.76609 |
| 166 | Isomaltose 1                  | 0.011779 | 4.95E-06 | 0.002425 | 1.16E-06 |

|     |                                         |          |          |          |          |
|-----|-----------------------------------------|----------|----------|----------|----------|
| 167 | Isoxanthopterin                         | 0.094361 | 0.891162 | 0.068237 | 0.252978 |
| 168 | Itaconic acid                           | 0.046388 | 4.725149 | 0.216507 | 0.04701  |
| 169 | kyotorphin 2                            | 0.03054  | 0.64091  | 0.125504 | 0.267392 |
| 170 | Lactamide 1                             | 4.61E-07 | 0.050269 | 0.006803 | 0.008573 |
| 171 | lactic acid                             | 0.091786 | 1.24455  | 0.117581 | 0.308659 |
| 172 | Lactobionic Acid 1                      | 0.385991 | 3.234625 | 0.49789  | 0.72589  |
| 173 | lactose 1                               | 0.04288  | 0.238179 | 0.010463 | 0.052301 |
| 174 | L-Allothreonine 1                       | 4.61E-07 | 34.934   | 2.716394 | 7.346707 |
| 175 | Leucrose 2                              | 0.03365  | 0.036498 | 0.011407 | 0.000898 |
| 176 | Levogluconan                            | 0.006223 | 0.085143 | 0.038778 | 0.055053 |
| 177 | L-homoserine 1                          | 0.022291 | 0.288567 | 0.026624 | 0.067222 |
| 178 | linoleic acid                           | 0.36855  | 1.524426 | 0.34494  | 0.596206 |
| 179 | linolenic acid                          | 0.792496 | 10.12624 | 0.825207 | 1.068522 |
| 180 | lipoic acid                             | 0.239491 | 2.276192 | 0.124735 | 0.252249 |
| 181 | L-Threose 1                             | 0.004739 | 0.364254 | 0.037758 | 1.16E-06 |
| 182 | Lyxose 1                                | 6.473776 | 118.991  | 9.818863 | 1.16E-06 |
| 183 | Maleamate 2                             | 0.036516 | 0.161561 | 0.015032 | 0.043166 |
| 184 | maleic acid                             | 4.61E-07 | 1.395783 | 0.013752 | 1.16E-06 |
| 185 | Maleimide                               | 0.050555 | 0.534178 | 0.034371 | 0.068341 |
| 186 | malonic acid 1                          | 0.135201 | 1.549316 | 0.140989 | 0.359741 |
| 187 | maltitol                                | 4.61E-07 | 4.95E-06 | 5.23E-07 | 1.16E-06 |
| 188 | mannitol                                | 4.61E-07 | 4.95E-06 | 0.322595 | 1.16E-06 |
| 189 | melibiose 1                             | 0.525399 | 1.467668 | 0.152095 | 0.017548 |
| 190 | methionine 1                            | 2.626159 | 20.18796 | 1.886207 | 1.16E-06 |
| 191 | methionine sulfoxide 2                  | 0.03622  | 0.453515 | 0.034921 | 0.16441  |
| 192 | Methoxamedrine 2                        | 4.61E-07 | 0.255704 | 0.003114 | 0.008161 |
| 193 | Methyl Phosphate                        | 0.006447 | 4.95E-06 | 5.23E-07 | 0.007295 |
| 194 | Methyl yellow                           | 4.61E-07 | 4.95E-06 | 5.23E-07 | 1.16E-06 |
| 195 | Methylmalonic acid                      | 0.029963 | 0.350715 | 0.01707  | 0.026436 |
| 196 | Monostearin                             | 0.03565  | 0.29267  | 0.031611 | 0.064517 |
| 197 | mucic acid                              | 0.030505 | 0.255227 | 0.036564 | 1.16E-06 |
| 198 | myo-inositol                            | 1.049071 | 66.00075 | 7.978255 | 13.37934 |
| 199 | Myristic Acid                           | 0.049799 | 0.629649 | 0.080956 | 0.140723 |
| 200 | N-(2-hydroxyethyl)-iminodiacetic acid 2 | 0.073079 | 3.146003 | 0.327371 | 0.280037 |
| 201 | N(alpha),N(alpha)-dimethyl-L-histidine  | 2.940182 | 68.21115 | 6.579613 | 13.64018 |
| 202 | N-Acetyl-beta-D-mannosamine 1           | 0.053758 | 2.680742 | 0.365767 | 0.247539 |
| 203 | N-Acetyl-D-galactosamine 1              | 0.002312 | 0.039316 | 0.005002 | 0.026719 |
| 204 | N-Acetyl-L-glutamic acid 2              | 0.102341 | 1.893102 | 0.280878 | 0.249097 |
| 205 | N-Acetyl-L-leucine 2                    | 0.249465 | 4.95E-06 | 5.23E-07 | 0.59684  |
| 206 | N-Acetyltryptophan 2                    | 4.61E-07 | 0.298919 | 0.068149 | 1.16E-06 |
| 207 | N-alpha-Acetyl-L-ornithine 1            | 0.089891 | 4.95E-06 | 0.114727 | 0.058707 |
| 208 | naphthalene                             | 4.61E-07 | 0.662771 | 0.095896 | 1.16E-06 |

|     |                               |          |          |          |          |
|-----|-------------------------------|----------|----------|----------|----------|
| 209 | naringenin 3                  | 0.017145 | 0.602959 | 0.061947 | 0.197168 |
| 210 | N-Carbamylglutamate 4         | 0.016508 | 0.176804 | 0.026508 | 1.16E-06 |
| 211 | N-cyclohexylformamide 2       | 0.22108  | 2.1042   | 0.225471 | 0.242465 |
| 212 | Neohesperidin                 | 0.008726 | 0.068195 | 0.010753 | 0.066276 |
| 213 | N-Methyl-DL-alanine           | 4.61E-07 | 4.95E-06 | 5.23E-07 | 0.044007 |
| 214 | N-Methyl-L-glutamic acid 3    | 0.080545 | 0.809325 | 0.065787 | 0.142968 |
| 215 | noradrenaline                 | 0.013186 | 0.018881 | 0.003817 | 0.018852 |
| 216 | O-acetylserine 1              | 0.00232  | 0.070067 | 0.009702 | 0.001114 |
| 217 | Octadecanol                   | 0.003947 | 0.032221 | 5.23E-07 | 1.16E-06 |
| 218 | ornithine 1                   | 1.065771 | 6.582132 | 1.470686 | 2.963732 |
| 219 | oxalacetic acid               | 0.043286 | 0.815758 | 0.04285  | 0.029846 |
| 220 | oxalic acid                   | 0.096579 | 0.81749  | 0.091293 | 0.257269 |
| 221 | oxamic acid                   | 4.61E-07 | 0.143304 | 0.015797 | 1.16E-06 |
| 222 | oxoproline                    | 25.25126 | 201.267  | 19.80546 | 51.40852 |
| 223 | palatinitol 1                 | 0.456418 | 1.661565 | 0.107454 | 0.024516 |
| 224 | palatinitol 2                 | 0.003174 | 0.159732 | 0.003453 | 1.16E-06 |
| 225 | palmitic acid                 | 13.6459  | 159.907  | 9.727686 | 27.50604 |
| 226 | palmitoleic acid              | 0.050241 | 0.703877 | 0.015122 | 0.209564 |
| 227 | p-Anisic acid                 | 0.056243 | 0.342397 | 0.030232 | 0.11718  |
| 228 | pantothenic acid              | 0.755496 | 7.948595 | 0.599636 | 0.484747 |
| 229 | Pelargonic acid               | 0.004373 | 0.072371 | 0.004938 | 1.16E-06 |
| 230 | pentadecanoic acid            | 0.048084 | 4.95E-06 | 5.23E-07 | 1.16E-06 |
| 231 | Phenyl beta-D-glucopyranoside | 0.037104 | 4.95E-06 | 0.002991 | 1.16E-06 |
| 232 | phenylalanine 1               | 26.4122  | 164.7419 | 15.28482 | 76.91741 |
| 233 | phenylalanine 2               | 0.512736 | 6.990973 | 0.862326 | 1.77548  |
| 234 | phenylethylamine              | 0.089086 | 0.8038   | 0.057186 | 0.198033 |
| 235 | Phytol                        | 0.246715 | 3.130116 | 0.384924 | 0.806849 |
| 236 | phytosphingosine 2            | 0.033855 | 0.315799 | 0.036314 | 0.030039 |
| 237 | Pipecolinic acid              | 0.145118 | 0.676486 | 0.065658 | 0.153967 |
| 238 | proline                       | 31.73083 | 158.8656 | 24.30037 | 63.30468 |
| 239 | prostaglandin A2 2            | 0.006038 | 0.104182 | 0.010788 | 0.012406 |
| 240 | Purine riboside               | 4.61E-07 | 4.95E-06 | 0.001821 | 1.16E-06 |
| 241 | putrescine 2                  | 3.077744 | 34.09061 | 2.061616 | 1.16E-06 |
| 242 | pyridoxal phosphate 1         | 0.013984 | 0.243779 | 0.028513 | 0.003059 |
| 243 | Pyrrole-2-Carboxylic Acid     | 0.05769  | 1.085184 | 0.024536 | 0.024066 |
| 244 | Pyruvic acid                  | 0.018709 | 0.092275 | 0.103032 | 0.001618 |
| 245 | quinic acid                   | 0.456839 | 5.504678 | 0.310605 | 0.310344 |
| 246 | resorcinol                    | 4.61E-07 | 0.038426 | 0.020998 | 1.16E-06 |
| 247 | resveratrol 1                 | 4.61E-07 | 4.95E-06 | 5.23E-07 | 1.16E-06 |
| 248 | ribitol                       | 11.30673 | 142.7521 | 15.17133 | 1.16E-06 |
| 249 | Ribonic acid, gamma-lactone   | 0.147476 | 1.961942 | 0.126198 | 0.419493 |
| 250 | ribose                        | 0.483194 | 9.548173 | 0.86839  | 0.198633 |

|     |                               |          |          |          |          |
|-----|-------------------------------|----------|----------|----------|----------|
| 251 | Saccharic acid                | 4.61E-07 | 0.034685 | 5.23E-07 | 0.032475 |
| 252 | salicin                       | 0.392074 | 5.588548 | 0.763777 | 0.483593 |
| 253 | salicylic acid                | 0.006948 | 0.071215 | 5.23E-07 | 0.007914 |
| 254 | serine 1                      | 3.026524 | 172.667  | 13.98758 | 30.74382 |
| 255 | serine 2                      | 1.305239 | 6.908027 | 1.243724 | 1.036904 |
| 256 | shikimic acid                 | 0.182643 | 3.928738 | 0.061656 | 0.075504 |
| 257 | sorbitol                      | 0.017947 | 0.048996 | 0.031401 | 0.043288 |
| 258 | spermidine 1                  | 0.065491 | 0.518237 | 0.089896 | 1.16E-06 |
| 259 | squalene                      | 0.126717 | 1.532126 | 0.099409 | 0.261722 |
| 260 | stearic acid                  | 1.361296 | 12.43215 | 1.971117 | 3.86976  |
| 261 | succinate semialdehyde 1      | 4.61E-07 | 0.234355 | 0.031073 | 1.16E-06 |
| 262 | succinic acid                 | 15.19088 | 135.406  | 10.54819 | 22.28505 |
| 263 | sucrose                       | 0.007164 | 0.070342 | 0.021605 | 0.020011 |
| 264 | sulfuric acid                 | 0.288671 | 4.95E-06 | 0.276651 | 0.613723 |
| 265 | Synephrine 1                  | 0.043499 | 1.070327 | 0.177542 | 1.16E-06 |
| 266 | Tagatose 1                    | 0.052339 | 1.088559 | 0.030529 | 0.253594 |
| 267 | tartaric acid                 | 0.013043 | 0.10457  | 0.016117 | 0.054541 |
| 268 | TES                           | 0.022621 | 1.546155 | 0.118482 | 0.021097 |
| 269 | Tetrahydrocorticosterone 2    | 4.61E-07 | 0.021764 | 0.002535 | 0.006999 |
| 270 | Threitol                      | 0.041103 | 1.05414  | 0.070389 | 0.417203 |
| 271 | threo-beta-hydroxyaspartate 2 | 0.357688 | 2.042798 | 0.136439 | 0.318179 |
| 272 | Threonic acid                 | 0.059825 | 0.370292 | 0.029197 | 0.1045   |
| 273 | threonine 2                   | 0.592659 | 2.40509  | 0.630036 | 0.780451 |
| 274 | thymidine 1                   | 4.61E-07 | 4.95E-06 | 0.025516 | 1.16E-06 |
| 275 | thymine                       | 0.041842 | 4.476471 | 0.286448 | 0.257841 |
| 276 | Thymol                        | 0.000918 | 0.09378  | 0.013133 | 0.013857 |
| 277 | toluenesulfonic acid          | 4.61E-07 | 4.95E-06 | 0.026502 | 1.16E-06 |
| 278 | trans-sinapinic acid          | 0.046086 | 0.457084 | 0.076188 | 0.060537 |
| 279 | trehalose                     | 0.355315 | 4.95E-06 | 0.017457 | 1.047115 |
| 280 | Tricetin                      | 0.035633 | 0.353098 | 0.023872 | 0.108087 |
| 281 | Turanose 2                    | 4.61E-07 | 4.95E-06 | 5.23E-07 | 0.005298 |
| 282 | tyramine                      | 10.5185  | 106.6508 | 1.298487 | 1.16E-06 |
| 283 | tyrosine 1                    | 2.343945 | 20.71037 | 2.935933 | 0.30866  |
| 284 | uracil                        | 4.197495 | 36.98003 | 3.032498 | 3.517458 |
| 285 | urea                          | 0.005818 | 0.592055 | 0.043486 | 0.026438 |
| 286 | uridine 2                     | 0.140781 | 0.637667 | 0.119255 | 0.939657 |
| 287 | valine 1                      | 0.954424 | 11.69505 | 2.370012 | 5.293462 |
| 288 | valine 2                      | 4.61E-07 | 205.1862 | 20.2528  | 40.88945 |
| 289 | xanthine                      | 0.037056 | 0.45939  | 5.23E-07 | 0.061359 |
| 290 | xylitol                       | 0.29125  | 2.262283 | 0.191655 | 0.842346 |
| 291 | xylose 2                      | 0.003616 | 0.639118 | 0.026537 | 1.16E-06 |
| 292 | Zymosterol 1                  | 0.100102 | 0.845955 | 0.081824 | 0.300911 |

|     |              |          |          |          |          |
|-----|--------------|----------|----------|----------|----------|
| 293 | Analyte 10   | 0.371014 | 3.94908  | 0.359226 | 0.873395 |
| 294 | Analyte 1003 | 0.018973 | 0.252759 | 5.23E-07 | 0.079951 |
| 295 | Analyte 1005 | 0.000354 | 4.95E-06 | 0.001575 | 0.001101 |
| 296 | Analyte 1007 | 0.002311 | 0.168134 | 0.03632  | 0.008281 |
| 297 | Analyte 1009 | 0.003486 | 0.053463 | 0.002262 | 1.16E-06 |
| 298 | Analyte 1013 | 0.00808  | 0.093094 | 0.026071 | 0.000329 |
| 299 | Analyte 1021 | 0.006533 | 0.101932 | 0.029402 | 0.002013 |
| 300 | Analyte 1022 | 4.61E-07 | 4.95E-06 | 0.005881 | 1.16E-06 |
| 301 | Analyte 1034 | 0.31526  | 3.091421 | 1.249576 | 1.16E-06 |
| 302 | Analyte 104  | 0.011788 | 0.134805 | 0.013044 | 0.019325 |
| 303 | Analyte 1045 | 0.027134 | 4.95E-06 | 5.23E-07 | 1.16E-06 |
| 304 | Analyte 105  | 0.023493 | 0.313539 | 0.035039 | 0.026006 |
| 305 | Analyte 1051 | 0.011048 | 0.579324 | 0.027018 | 0.099011 |
| 306 | Analyte 106  | 0.14192  | 1.045827 | 0.126468 | 0.349339 |
| 307 | Analyte 1063 | 0.013268 | 0.388203 | 0.03111  | 0.057395 |
| 308 | Analyte 1064 | 0.00258  | 0.057657 | 0.028652 | 0.168002 |
| 309 | Analyte 107  | 0.004081 | 0.051725 | 0.004252 | 0.017368 |
| 310 | Analyte 108  | 0.075045 | 0.539984 | 0.067457 | 0.189541 |
| 311 | Analyte 1082 | 0.322248 | 1.92725  | 0.206339 | 1.069669 |
| 312 | Analyte 1087 | 0.01284  | 0.428246 | 0.070615 | 0.030457 |
| 313 | Analyte 1097 | 0.041556 | 0.480575 | 0.09936  | 0.197707 |
| 314 | Analyte 110  | 0.302175 | 3.290375 | 0.22036  | 0.192127 |
| 315 | Analyte 1112 | 0.008211 | 0.158642 | 0.027512 | 0.059803 |
| 316 | Analyte 1114 | 0.044463 | 0.251749 | 0.090807 | 0.12097  |
| 317 | Analyte 116  | 0.010672 | 0.087027 | 0.008244 | 0.027254 |
| 318 | Analyte 117  | 0.021697 | 0.260961 | 0.027661 | 0.032725 |
| 319 | Analyte 12   | 4.61E-07 | 0.011223 | 0.001458 | 0.012931 |
| 320 | Analyte 120  | 0.098517 | 1.021481 | 0.114156 | 0.2081   |
| 321 | Analyte 1207 | 0.002946 | 4.95E-06 | 0.007594 | 0.020751 |
| 322 | Analyte 121  | 0.005433 | 0.049473 | 0.005908 | 0.007875 |
| 323 | Analyte 1214 | 0.045616 | 0.23591  | 0.057186 | 0.171002 |
| 324 | Analyte 1219 | 0.002436 | 0.045093 | 0.001348 | 0.006278 |
| 325 | Analyte 1223 | 0.056065 | 0.479562 | 0.043588 | 0.177869 |
| 326 | Analyte 1231 | 0.003474 | 0.041394 | 0.006701 | 0.010284 |
| 327 | Analyte 1237 | 0.003439 | 0.016168 | 0.006905 | 0.012775 |
| 328 | Analyte 1238 | 0.200581 | 8.059301 | 0.671496 | 0.652759 |
| 329 | Analyte 1245 | 0.073099 | 3.416175 | 0.347602 | 0.393409 |
| 330 | Analyte 1249 | 0.042216 | 0.190062 | 0.013949 | 0.116545 |
| 331 | Analyte 1256 | 0.069275 | 1.551513 | 0.173218 | 0.044451 |
| 332 | Analyte 1258 | 0.052418 | 1.442786 | 0.167077 | 0.050073 |
| 333 | Analyte 126  | 0.026961 | 0.1404   | 0.076314 | 0.199855 |
| 334 | Analyte 1260 | 0.07184  | 0.532295 | 0.077878 | 0.22809  |



|     |              |          |          |          |          |
|-----|--------------|----------|----------|----------|----------|
| 335 | Analyte 1270 | 0.011648 | 0.132438 | 0.00525  | 0.010418 |
| 336 | Analyte 1271 | 0.74159  | 6.602248 | 0.551534 | 1.451547 |
| 337 | Analyte 1272 | 0.030321 | 4.95E-06 | 0.024894 | 0.062265 |
| 338 | Analyte 129  | 0.207499 | 1.711753 | 0.191688 | 0.525837 |
| 339 | Analyte 137  | 0.005693 | 0.032543 | 0.005262 | 0.00925  |
| 340 | Analyte 14   | 0.00446  | 0.044319 | 0.004442 | 0.004128 |
| 341 | Analyte 141  | 0.026124 | 0.154256 | 0.010102 | 0.074926 |
| 342 | Analyte 144  | 0.041673 | 0.373849 | 0.044472 | 0.032601 |
| 343 | Analyte 17   | 0.003263 | 4.95E-06 | 0.007088 | 0.005305 |
| 344 | Analyte 178  | 0.004043 | 0.008724 | 0.002009 | 0.009874 |
| 345 | Analyte 180  | 0.282254 | 2.031304 | 0.194473 | 0.586872 |
| 346 | Analyte 183  | 0.026661 | 0.205111 | 0.019141 | 0.026016 |
| 347 | Analyte 184  | 1.74037  | 18.73872 | 3.228203 | 8.820345 |
| 348 | Analyte 185  | 0.003312 | 4.95E-06 | 0.015252 | 0.014461 |
| 349 | Analyte 19   | 0.013896 | 0.261312 | 0.012178 | 1.16E-06 |
| 350 | Analyte 192  | 0.028699 | 0.190476 | 0.037035 | 0.060168 |
| 351 | Analyte 20   | 4.61E-07 | 0.01511  | 0.002814 | 0.010505 |
| 352 | Analyte 200  | 0.018324 | 0.043762 | 0.00475  | 0.015651 |
| 353 | Analyte 201  | 0.012183 | 0.14854  | 0.023341 | 0.005408 |
| 354 | Analyte 203  | 0.011196 | 0.117596 | 0.007392 | 0.005738 |
| 355 | Analyte 205  | 0.106172 | 0.691637 | 0.090446 | 0.195411 |
| 356 | Analyte 218  | 0.033859 | 0.414966 | 0.043616 | 1.16E-06 |
| 357 | Analyte 22   | 0.37279  | 4.378349 | 0.406825 | 0.671335 |
| 358 | Analyte 228  | 0.013314 | 0.135211 | 0.013297 | 0.014374 |
| 359 | Analyte 23   | 0.007503 | 0.101962 | 0.011909 | 0.016587 |
| 360 | Analyte 230  | 4.61E-07 | 4.95E-06 | 0.052209 | 1.16E-06 |
| 361 | Analyte 24   | 0.118911 | 1.265105 | 0.156737 | 0.255403 |
| 362 | Analyte 255  | 0.088173 | 1.050578 | 0.083297 | 0.072351 |
| 363 | Analyte 26   | 0.005502 | 4.95E-06 | 0.018964 | 0.015558 |
| 364 | Analyte 265  | 4.61E-07 | 0.038828 | 0.00136  | 1.16E-06 |
| 365 | Analyte 29   | 0.352298 | 2.865165 | 0.317189 | 0.461664 |
| 366 | Analyte 3    | 0.085061 | 1.018771 | 0.053986 | 0.506847 |
| 367 | Analyte 31   | 0.030496 | 0.406999 | 5.23E-07 | 0.11145  |
| 368 | Analyte 32   | 0.002165 | 0.064518 | 0.010401 | 0.014994 |
| 369 | Analyte 33   | 4.546539 | 34.8146  | 3.624355 | 5.13036  |
| 370 | Analyte 334  | 0.105044 | 0.919336 | 0.116467 | 0.108771 |
| 371 | Analyte 337  | 4.61E-07 | 0.084542 | 0.004509 | 1.16E-06 |
| 372 | Analyte 338  | 0.006242 | 0.203014 | 5.23E-07 | 1.16E-06 |
| 373 | Analyte 348  | 0.409047 | 4.95E-06 | 5.23E-07 | 0.266532 |
| 374 | Analyte 351  | 0.153355 | 1.782619 | 0.150674 | 1.16E-06 |
| 375 | Analyte 354  | 4.61E-07 | 0.191068 | 0.030029 | 1.16E-06 |
| 376 | Analyte 365  | 0.00643  | 0.093804 | 0.008147 | 1.16E-06 |

|     |             |          |          |          |          |
|-----|-------------|----------|----------|----------|----------|
| 377 | Analyte 371 | 0.012945 | 0.157069 | 0.013319 | 1.16E-06 |
| 378 | Analyte 38  | 4.61E-07 | 15.0792  | 1.829635 | 1.16E-06 |
| 379 | Analyte 393 | 0.17434  | 0.884258 | 0.085957 | 0.131287 |
| 380 | Analyte 401 | 0.033838 | 0.307412 | 0.026303 | 0.060163 |
| 381 | Analyte 402 | 0.02356  | 4.95E-06 | 5.23E-07 | 0.051346 |
| 382 | Analyte 414 | 0.002439 | 0.215258 | 0.016095 | 0.005859 |
| 383 | Analyte 423 | 0.012145 | 0.18343  | 0.018811 | 0.020522 |
| 384 | Analyte 424 | 0.206172 | 2.378887 | 0.167468 | 0.430285 |
| 385 | Analyte 43  | 0.301698 | 3.531212 | 0.405502 | 1.16E-06 |
| 386 | Analyte 438 | 4.61E-07 | 0.019039 | 0.003466 | 1.16E-06 |
| 387 | Analyte 440 | 0.00907  | 0.06727  | 0.008371 | 0.028954 |
| 388 | Analyte 45  | 0.112725 | 0.94732  | 0.073293 | 0.22515  |
| 389 | Analyte 455 | 7.303574 | 176.4227 | 5.744805 | 90.23765 |
| 390 | Analyte 459 | 0.007058 | 0.116539 | 0.008771 | 0.0298   |
| 391 | Analyte 465 | 4.61E-07 | 4.95E-06 | 5.23E-07 | 1.16E-06 |
| 392 | Analyte 47  | 0.038353 | 0.530607 | 0.037051 | 0.137004 |
| 393 | Analyte 48  | 0.002541 | 4.95E-06 | 0.001322 | 0.005277 |
| 394 | Analyte 49  | 0.031145 | 0.345172 | 0.037207 | 0.111301 |
| 395 | Analyte 490 | 0.00518  | 0.140719 | 0.003846 | 1.16E-06 |
| 396 | Analyte 5   | 0.767772 | 7.811543 | 0.82069  | 1.16E-06 |
| 397 | Analyte 51  | 0.049637 | 0.441952 | 0.039892 | 0.139098 |
| 398 | Analyte 510 | 0.012092 | 0.172149 | 0.039764 | 1.16E-06 |
| 399 | Analyte 514 | 0.026989 | 0.832331 | 0.153854 | 1.16E-06 |
| 400 | Analyte 53  | 4.61E-07 | 4.95E-06 | 5.23E-07 | 1.16E-06 |
| 401 | Analyte 55  | 4.61E-07 | 4.95E-06 | 5.23E-07 | 0.008496 |
| 402 | Analyte 56  | 0.333083 | 3.370925 | 0.158282 | 0.252481 |
| 403 | Analyte 571 | 4.61E-07 | 4.95E-06 | 5.23E-07 | 1.16E-06 |
| 404 | Analyte 58  | 0.139771 | 1.420762 | 0.164981 | 0.366366 |
| 405 | Analyte 585 | 0.013338 | 0.062302 | 0.019158 | 0.064193 |
| 406 | Analyte 59  | 0.022968 | 0.217797 | 0.047972 | 0.061589 |
| 407 | Analyte 61  | 0.202605 | 2.132777 | 0.211736 | 0.346391 |
| 408 | Analyte 62  | 0.267638 | 2.674699 | 0.24368  | 0.781134 |
| 409 | Analyte 64  | 1.556497 | 17.18042 | 1.663111 | 3.473816 |
| 410 | Analyte 66  | 0.205854 | 1.755582 | 0.154599 | 0.140418 |
| 411 | Analyte 67  | 0.010938 | 0.13752  | 5.23E-07 | 0.002292 |
| 412 | Analyte 7   | 0.300377 | 2.82732  | 0.308231 | 0.755104 |
| 413 | Analyte 71  | 0.501023 | 5.054175 | 0.482291 | 1.295213 |
| 414 | Analyte 73  | 0.035309 | 0.470367 | 0.042693 | 0.086099 |
| 415 | Analyte 758 | 0.002691 | 4.95E-06 | 0.00031  | 0.000825 |
| 416 | Analyte 771 | 0.045157 | 0.429675 | 0.0234   | 0.052745 |
| 417 | Analyte 78  | 0.024331 | 0.286527 | 0.0291   | 0.045481 |
| 418 | Analyte 793 | 4.61E-07 | 2.783146 | 0.123063 | 0.395545 |

|     |             |          |          |          |          |
|-----|-------------|----------|----------|----------|----------|
| 419 | Analyte 796 | 0.008403 | 0.434193 | 0.000114 | 1.16E-06 |
| 420 | Analyte 797 | 0.007439 | 0.030704 | 5.23E-07 | 0.025762 |
| 421 | Analyte 8   | 0.569181 | 9.254889 | 0.191657 | 1.16E-06 |
| 422 | Analyte 800 | 4.61E-07 | 4.95E-06 | 5.23E-07 | 1.16E-06 |
| 423 | Analyte 812 | 0.008673 | 4.95E-06 | 5.23E-07 | 1.16E-06 |
| 424 | Analyte 82  | 4.61E-07 | 0.116963 | 5.23E-07 | 1.16E-06 |
| 425 | Analyte 871 | 0.244616 | 2.563614 | 0.265328 | 0.001944 |
| 426 | Analyte 88  | 0.01177  | 0.159503 | 5.23E-07 | 1.16E-06 |
| 427 | Analyte 889 | 0.022029 | 0.220831 | 0.031843 | 1.16E-06 |
| 428 | Analyte 893 | 0.001064 | 0.003684 | 0.004415 | 7.98E-05 |
| 429 | Analyte 898 | 0.008749 | 0.047405 | 0.009785 | 0.00099  |
| 430 | Analyte 899 | 0.002608 | 4.95E-06 | 5.23E-07 | 1.16E-06 |
| 431 | Analyte 9   | 1.18743  | 15.65403 | 2.525604 | 2.651812 |
| 432 | Analyte 90  | 0.129347 | 9.80869  | 0.38951  | 0.645307 |
| 433 | Analyte 902 | 0.026739 | 0.596227 | 0.030475 | 0.021987 |
| 434 | Analyte 905 | 0.292715 | 4.508586 | 0.702641 | 1.16E-06 |
| 435 | Analyte 907 | 4.61E-07 | 0.05837  | 5.23E-07 | 1.16E-06 |
| 436 | Analyte 916 | 4.61E-07 | 0.037979 | 0.00195  | 1.16E-06 |
| 437 | Analyte 924 | 4.61E-07 | 4.95E-06 | 5.23E-07 | 1.16E-06 |
| 438 | Analyte 925 | 0.039091 | 0.036327 | 0.00453  | 0.109332 |
| 439 | Analyte 957 | 0.041464 | 0.170526 | 0.011727 | 1.16E-06 |
| 440 | Analyte 961 | 4.61E-07 | 4.95E-06 | 5.23E-07 | 1.16E-06 |
| 441 | Analyte 962 | 0.073023 | 0.349696 | 0.068477 | 0.153193 |
| 442 | Analyte 963 | 4.61E-07 | 0.096943 | 0.051024 | 0.035507 |
| 443 | Analyte 97  | 0.112912 | 1.062492 | 0.118854 | 0.28233  |
| 444 | Analyte 970 | 0.009695 | 0.132759 | 0.018318 | 0.007301 |
| 445 | Analyte 971 | 0.006103 | 0.08297  | 0.012202 | 0.028978 |
| 446 | Analyte 974 | 4.61E-07 | 0.361051 | 0.134343 | 1.16E-06 |
| 447 | Analyte 975 | 0.007292 | 0.085501 | 0.016232 | 0.002094 |
| 448 | Analyte 984 | 0.073148 | 4.95E-06 | 5.23E-07 | 1.16E-06 |
| 449 | Analyte 986 | 0.005399 | 0.24222  | 0.008097 | 0.091246 |
| 450 | Analyte 987 | 4.61E-07 | 4.95E-06 | 5.23E-07 | 0.009543 |
| 451 | unknown     | 4.61E-07 | 4.95E-06 | 5.23E-07 | 1.16E-06 |
| 452 | unknown     | 0.055242 | 0.293422 | 5.23E-07 | 0.000212 |
| 453 | unknown     | 0.443357 | 1.757015 | 0.282981 | 0.551123 |
| 454 | unknown     | 0.032938 | 0.379479 | 0.030135 | 1.16E-06 |
| 455 | unknown     | 4.61E-07 | 4.95E-06 | 5.23E-07 | 1.16E-06 |
| 456 | unknown     | 4.61E-07 | 0.421672 | 0.016628 | 0.057331 |
| 457 | unknown     | 0.005463 | 0.052535 | 0.007365 | 0.004516 |
| 458 | unknown     | 0.006494 | 0.02143  | 0.011331 | 1.16E-06 |
| 459 | unknown     | 0.006918 | 0.063838 | 0.015359 | 0.027151 |
| 460 | unknown     | 0.02179  | 0.98179  | 0.158867 | 0.247696 |

|     |         |          |          |          |          |
|-----|---------|----------|----------|----------|----------|
| 461 | unknown | 4.61E-07 | 4.95E-06 | 0.142581 | 0.31991  |
| 462 | unknown | 0.017794 | 0.150269 | 0.010054 | 0.050687 |
| 463 | unknown | 0.000811 | 0.030739 | 5.23E-07 | 1.16E-06 |
| 464 | unknown | 4.61E-07 | 0.760564 | 0.138344 | 1.16E-06 |
| 465 | unknown | 4.61E-07 | 4.95E-06 | 5.23E-07 | 1.16E-06 |
| 466 | unknown | 0.044885 | 0.309338 | 0.02801  | 0.11001  |
| 467 | unknown | 0.018381 | 0.165389 | 0.013339 | 0.023093 |
| 468 | unknown | 0.027871 | 0.256383 | 0.02369  | 0.027897 |
| 469 | unknown | 0.027774 | 0.261999 | 0.006441 | 0.011044 |
| 470 | unknown | 0.017464 | 0.098349 | 5.23E-07 | 1.16E-06 |
| 471 | unknown | 4.61E-07 | 4.95E-06 | 5.23E-07 | 0.017553 |
| 472 | unknown | 0.019772 | 0.160182 | 0.016697 | 0.013011 |
| 473 | unknown | 0.008482 | 0.560936 | 0.066174 | 1.16E-06 |
| 474 | unknown | 0.019436 | 0.161219 | 5.23E-07 | 1.16E-06 |
| 475 | unknown | 4.61E-07 | 4.95E-06 | 5.23E-07 | 1.16E-06 |
| 476 | unknown | 0.008822 | 0.047179 | 0.006659 | 0.028631 |
| 477 | unknown | 0.00446  | 0.111571 | 5.23E-07 | 0.001707 |
| 478 | unknown | 0.005211 | 0.037434 | 0.005464 | 0.002653 |
| 479 | unknown | 0.098782 | 0.547776 | 0.04282  | 0.233675 |
| 480 | unknown | 0.137045 | 1.453498 | 0.193927 | 0.488437 |
| 481 | unknown | 0.041792 | 0.401198 | 0.039828 | 0.138191 |
| 482 | unknown | 4.61E-07 | 0.019053 | 0.001024 | 0.001376 |
| 483 | unknown | 0.034895 | 0.535196 | 0.053744 | 0.0338   |
| 484 | unknown | 0.006245 | 0.081824 | 0.012439 | 0.020895 |
| 485 | unknown | 0.05228  | 0.568005 | 0.058858 | 1.16E-06 |
| 486 | unknown | 0.010062 | 0.130937 | 0.009861 | 0.022178 |
| 487 | unknown | 0.028869 | 4.95E-06 | 0.206095 | 1.16E-06 |
| 488 | unknown | 0.012512 | 0.224401 | 0.024723 | 1.16E-06 |
| 489 | unknown | 0.007609 | 0.400437 | 0.026402 | 0.076898 |
| 490 | unknown | 0.07573  | 0.846345 | 0.067224 | 0.051541 |
| 491 | unknown | 4.61E-07 | 0.025206 | 5.23E-07 | 1.16E-06 |
| 492 | unknown | 0.002095 | 0.04636  | 0.003548 | 1.16E-06 |
| 493 | unknown | 0.061802 | 0.462837 | 0.04389  | 0.199062 |
| 494 | unknown | 0.099979 | 1.030057 | 0.104414 | 0.132012 |
| 495 | unknown | 0.003045 | 0.036278 | 5.23E-07 | 1.16E-06 |
| 496 | unknown | 0.003314 | 0.050523 | 0.007184 | 0.002413 |
| 497 | unknown | 0.008738 | 0.246999 | 0.011607 | 0.022835 |
| 498 | unknown | 0.059255 | 0.225499 | 0.03515  | 0.158825 |
| 499 | unknown | 0.002086 | 0.098702 | 0.010387 | 1.16E-06 |
| 500 | unknown | 0.009209 | 0.61524  | 0.061568 | 0.100031 |
| 501 | unknown | 4.61E-07 | 0.032383 | 5.23E-07 | 1.16E-06 |
| 502 | unknown | 0.021281 | 0.075908 | 0.021787 | 1.16E-06 |

|     |         |          |          |          |          |
|-----|---------|----------|----------|----------|----------|
| 503 | unknown | 0.017774 | 0.121173 | 0.016253 | 0.044729 |
| 504 | unknown | 0.020149 | 0.099647 | 0.011613 | 0.017167 |
| 505 | unknown | 0.002209 | 0.025535 | 0.002549 | 0.003927 |
| 506 | unknown | 0.040678 | 0.312064 | 0.01901  | 0.007123 |
| 507 | unknown | 0.015167 | 0.025426 | 5.23E-07 | 0.013286 |
| 508 | unknown | 0.038782 | 0.181203 | 0.019351 | 0.004851 |
| 509 | unknown | 4.61E-07 | 0.171899 | 0.021906 | 1.16E-06 |
| 510 | unknown | 0.055368 | 0.693797 | 0.076571 | 1.16E-06 |
| 511 | unknown | 0.009361 | 0.330298 | 0.0238   | 0.00302  |
| 512 | unknown | 0.083285 | 0.94231  | 0.062174 | 0.081028 |
| 513 | unknown | 0.033612 | 0.197091 | 0.01819  | 0.085041 |
| 514 | unknown | 4.61E-07 | 4.95E-06 | 0.003298 | 1.16E-06 |
| 515 | unknown | 0.048148 | 0.395086 | 0.046884 | 0.059396 |
| 516 | unknown | 0.171235 | 1.759541 | 5.23E-07 | 1.16E-06 |
| 517 | unknown | 4.61E-07 | 0.054658 | 5.23E-07 | 0.00328  |
| 518 | unknown | 0.195248 | 1.381856 | 0.111321 | 0.408022 |
| 519 | unknown | 4.61E-07 | 0.138321 | 5.23E-07 | 1.16E-06 |
| 520 | unknown | 0.027049 | 0.194698 | 0.019337 | 0.042    |
| 521 | unknown | 0.023811 | 0.40639  | 0.025363 | 0.056514 |
| 522 | unknown | 0.006318 | 0.052829 | 5.23E-07 | 1.16E-06 |
| 523 | unknown | 0.239675 | 2.684175 | 0.075215 | 0.124064 |
| 524 | unknown | 0.005916 | 0.016839 | 0.00505  | 0.004004 |
| 525 | unknown | 0.000331 | 0.003812 | 0.001578 | 0.002001 |
| 526 | unknown | 4.61E-07 | 0.040731 | 5.23E-07 | 1.16E-06 |
| 527 | unknown | 0.006338 | 0.127868 | 0.010409 | 1.16E-06 |
| 528 | unknown | 0.015318 | 0.681998 | 0.001978 | 0.002136 |
| 529 | unknown | 0.009991 | 0.088857 | 0.01109  | 0.012227 |
| 530 | unknown | 2.243426 | 14.08096 | 0.88694  | 1.16E-06 |
| 531 | unknown | 0.006061 | 0.024791 | 0.000913 | 0.003096 |
| 532 | unknown | 0.066266 | 0.753966 | 0.076098 | 1.16E-06 |
| 533 | unknown | 0.005362 | 0.627849 | 0.028906 | 1.16E-06 |
| 534 | unknown | 0.012265 | 0.167207 | 0.006443 | 0.013858 |
| 535 | unknown | 0.405879 | 2.961217 | 0.164609 | 0.828943 |
| 536 | unknown | 4.61E-07 | 4.95E-06 | 5.23E-07 | 1.16E-06 |
| 537 | unknown | 0.145649 | 2.185148 | 0.173716 | 0.73582  |
| 538 | unknown | 0.001802 | 4.95E-06 | 0.008058 | 1.16E-06 |
| 539 | unknown | 0.00117  | 0.035759 | 0.003438 | 0.002281 |
| 540 | unknown | 0.057748 | 0.66847  | 0.126844 | 0.031826 |
| 541 | unknown | 4.61E-07 | 0.135651 | 0.00588  | 1.16E-06 |
| 542 | unknown | 0.008706 | 0.351586 | 0.025029 | 0.01538  |
| 543 | unknown | 0.002631 | 0.020267 | 5.23E-07 | 0.007153 |
| 544 | unknown | 0.116932 | 0.91213  | 0.032389 | 0.141945 |

|     |         |          |          |          |          |
|-----|---------|----------|----------|----------|----------|
| 545 | unknown | 0.002403 | 0.015613 | 0.007281 | 0.024737 |
| 546 | unknown | 0.004656 | 0.096198 | 0.004756 | 1.16E-06 |
| 547 | unknown | 4.61E-07 | 2.854123 | 0.266026 | 1.16E-06 |
| 548 | unknown | 4.61E-07 | 0.028682 | 5.23E-07 | 1.16E-06 |
| 549 | unknown | 0.015269 | 0.598298 | 0.122329 | 0.053921 |
| 550 | unknown | 4.61E-07 | 4.95E-06 | 0.052965 | 1.16E-06 |
| 551 | unknown | 0.006689 | 0.103484 | 0.008365 | 1.16E-06 |
| 552 | unknown | 0.007666 | 0.337992 | 0.022338 | 1.16E-06 |
| 553 | unknown | 0.00741  | 4.95E-06 | 5.23E-07 | 0.03129  |
| 554 | unknown | 0.017238 | 0.233887 | 0.031512 | 0.095741 |
| 555 | unknown | 0.023186 | 0.389686 | 0.008757 | 1.16E-06 |
| 556 | unknown | 4.61E-07 | 0.132755 | 0.002786 | 0.005533 |
| 557 | unknown | 0.000306 | 0.01369  | 0.008043 | 0.000782 |
| 558 | unknown | 0.069009 | 0.578113 | 0.032349 | 1.16E-06 |
| 559 | unknown | 0.021186 | 0.131454 | 0.014579 | 0.039226 |
| 560 | unknown | 4.61E-07 | 4.95E-06 | 5.23E-07 | 1.16E-06 |
| 561 | unknown | 0.006535 | 0.180505 | 0.021634 | 1.16E-06 |
| 562 | unknown | 4.61E-07 | 4.95E-06 | 5.23E-07 | 1.16E-06 |
| 563 | unknown | 0.355979 | 5.158807 | 0.633612 | 0.206866 |
| 564 | unknown | 0.001246 | 0.047423 | 0.003625 | 1.16E-06 |
| 565 | unknown | 4.61E-07 | 0.184339 | 0.040884 | 1.16E-06 |
| 566 | unknown | 0.016649 | 4.95E-06 | 5.23E-07 | 1.16E-06 |
| 567 | unknown | 0.034943 | 4.95E-06 | 0.005814 | 1.16E-06 |
| 568 | unknown | 0.106169 | 4.95E-06 | 5.23E-07 | 0.397662 |
| 569 | unknown | 4.61E-07 | 2.85561  | 0.130456 | 0.498128 |
| 570 | unknown | 0.006279 | 0.055775 | 0.00661  | 0.005679 |
| 571 | unknown | 0.032852 | 0.320711 | 0.009121 | 0.024291 |
| 572 | unknown | 0.034201 | 0.365209 | 0.055188 | 0.066896 |
| 573 | unknown | 0.02122  | 0.163548 | 0.019624 | 0.012795 |
| 574 | unknown | 0.003865 | 0.001019 | 0.000108 | 1.16E-06 |
| 575 | unknown | 0.370933 | 2.88907  | 0.265096 | 0.806935 |
| 576 | unknown | 0.009727 | 0.359078 | 0.037456 | 0.11132  |
| 577 | unknown | 0.008009 | 0.139453 | 0.010402 | 0.024002 |
| 578 | unknown | 0.037482 | 4.95E-06 | 5.23E-07 | 1.16E-06 |
| 579 | unknown | 0.113471 | 1.171106 | 0.126742 | 0.252838 |
| 580 | unknown | 4.61E-07 | 0.184462 | 5.23E-07 | 0.010946 |
| 581 | unknown | 4.61E-07 | 1.459677 | 0.14737  | 1.16E-06 |
| 582 | unknown | 4.61E-07 | 0.314457 | 0.005484 | 0.00238  |
| 583 | unknown | 0.083234 | 0.679346 | 0.070563 | 0.206769 |
| 584 | unknown | 0.073098 | 0.77457  | 0.078002 | 0.075616 |
| 585 | unknown | 4.61E-07 | 0.073061 | 0.007919 | 1.16E-06 |
| 586 | unknown | 4.61E-07 | 4.95E-06 | 5.23E-07 | 1.16E-06 |

|     |         |          |          |          |          |
|-----|---------|----------|----------|----------|----------|
| 587 | unknown | 0.017105 | 0.204936 | 5.23E-07 | 0.044087 |
| 588 | unknown | 0.026288 | 0.073502 | 5.23E-07 | 1.16E-06 |
| 589 | unknown | 0.011575 | 0.369224 | 5.23E-07 | 0.09444  |
| 590 | unknown | 0.011846 | 0.144672 | 0.005862 | 0.009098 |
| 591 | unknown | 0.722954 | 5.327671 | 0.594175 | 0.953248 |
| 592 | unknown | 0.020072 | 0.244876 | 0.022115 | 0.041289 |
| 593 | unknown | 0.006917 | 0.189372 | 0.006307 | 0.045768 |
| 594 | unknown | 0.077647 | 0.655338 | 0.056901 | 0.077926 |
| 595 | unknown | 0.018128 | 0.207645 | 0.019235 | 0.012973 |
| 596 | unknown | 0.027407 | 1.596851 | 0.070893 | 0.567881 |
| 597 | unknown | 0.000213 | 0.007816 | 0.001015 | 1.16E-06 |
| 598 | unknown | 4.61E-07 | 4.95E-06 | 5.23E-07 | 1.16E-06 |
| 599 | unknown | 0.690196 | 7.163035 | 0.397739 | 1.16E-06 |
| 600 | unknown | 0.052001 | 1.631926 | 0.107539 | 0.012095 |
| 601 | unknown | 0.046671 | 0.36961  | 0.046395 | 0.115883 |
| 602 | unknown | 0.029445 | 0.417571 | 0.08967  | 0.01204  |
| 603 | unknown | 0.012855 | 0.163973 | 0.008573 | 0.023328 |
| 604 | unknown | 0.074554 | 2.269574 | 0.19969  | 1.16E-06 |
| 605 | unknown | 0.21141  | 4.95E-06 | 5.23E-07 | 1.16E-06 |
| 606 | unknown | 0.001705 | 0.043096 | 0.015868 | 0.003049 |
| 607 | unknown | 0.145913 | 2.759729 | 0.171337 | 0.318271 |
| 608 | unknown | 0.012269 | 0.150688 | 0.011057 | 1.16E-06 |
| 609 | unknown | 0.031519 | 0.165725 | 0.028656 | 0.191656 |
| 610 | unknown | 0.020574 | 0.043997 | 0.028213 | 0.074849 |
| 611 | unknown | 0.002221 | 0.272569 | 0.011435 | 0.017669 |
| 612 | unknown | 0.093353 | 0.798741 | 0.046981 | 0.190762 |
| 613 | unknown | 0.004001 | 0.306957 | 0.022954 | 0.00915  |
| 614 | unknown | 0.02604  | 1.125999 | 0.18984  | 0.026909 |
| 615 | unknown | 0.022368 | 0.420732 | 5.23E-07 | 0.09591  |
| 616 | unknown | 0.102464 | 6.094261 | 0.23704  | 0.044334 |
| 617 | unknown | 4.61E-07 | 0.122133 | 5.23E-07 | 1.16E-06 |
| 618 | unknown | 0.061953 | 0.451005 | 0.070382 | 0.112812 |
| 619 | unknown | 0.052896 | 1.091441 | 0.125488 | 0.343388 |
| 620 | unknown | 0.463515 | 19.91465 | 0.201388 | 1.16E-06 |
| 621 | unknown | 0.038925 | 0.695854 | 0.133689 | 0.287102 |
| 622 | unknown | 0.0054   | 0.413787 | 5.23E-07 | 1.16E-06 |
| 623 | unknown | 0.023969 | 0.835666 | 0.031496 | 0.064722 |
| 624 | unknown | 0.019517 | 0.723941 | 0.079626 | 1.16E-06 |
| 625 | unknown | 0.164501 | 4.319821 | 0.207841 | 0.087033 |
| 626 | unknown | 0.020002 | 0.291485 | 0.021426 | 0.117117 |
| 627 | unknown | 7.277356 | 65.70456 | 6.188874 | 18.3677  |
| 628 | unknown | 0.19582  | 0.196167 | 0.005421 | 0.024608 |

|     |                   |          |          |          |          |
|-----|-------------------|----------|----------|----------|----------|
| 629 | unknown           | 0.014738 | 0.051563 | 5.23E-07 | 0.086742 |
| 630 | unknown           | 0.006709 | 0.125184 | 0.004453 | 1.16E-06 |
| 631 | unknown           | 0.126424 | 3.83116  | 0.040951 | 0.007213 |
| 632 | unknown           | 0.019705 | 3.931358 | 0.47477  | 0.02165  |
| 633 | unknown           | 0.064979 | 1.045186 | 0.079051 | 0.010279 |
| 634 | unknown           | 0.153532 | 4.95E-06 | 0.848745 | 1.649207 |
| 635 | unknown           | 6.12E-06 | 4.95E-06 | 5.23E-07 | 0.000265 |
| 636 | unknown           | 0.018762 | 0.163762 | 0.029312 | 0.05024  |
| 637 | unknown           | 0.150456 | 1.560878 | 0.176237 | 0.283633 |
| 638 | unknown           | 6.04775  | 229.1711 | 27.8764  | 31.87469 |
| 639 | unknown           | 0.048135 | 1.2428   | 0.16216  | 0.125233 |
| 640 | unknown           | 4.61E-07 | 4.95E-06 | 5.23E-07 | 1.16E-06 |
| 641 | unknown           | 0.012159 | 0.406413 | 0.063367 | 1.16E-06 |
| 642 | unknown           | 0.010177 | 0.320071 | 0.004883 | 0.00441  |
| 643 | unknown           | 0.003749 | 1.136371 | 0.15185  | 1.16E-06 |
| 644 | unknown           | 4.61E-07 | 4.95E-06 | 5.23E-07 | 1.16E-06 |
| 645 | unknown           | 0.223936 | 3.468669 | 0.209636 | 1.16E-06 |
| 646 | unknown           | 0.294263 | 3.125085 | 0.289115 | 0.120514 |
| 647 | unknown           | 0.017287 | 4.95E-06 | 0.005617 | 1.16E-06 |
| 648 | unknown           | 0.197955 | 3.590781 | 0.349833 | 0.268696 |
| 649 | unknown           | 0.024526 | 0.216096 | 0.05474  | 0.119457 |
| 650 | unknown           | 0.022481 | 0.197713 | 0.005497 | 0.017903 |
| 651 | unknown           | 0.111861 | 2.428353 | 0.048292 | 0.40496  |
| 652 | unknown           | 0.017323 | 0.772131 | 5.23E-07 | 0.095546 |
| 653 | unknown           | 0.016354 | 0.201761 | 0.004739 | 0.017317 |
| 654 | unknown           | 0.010249 | 2.647486 | 0.245352 | 0.470793 |
| 655 | unknown           | 0.481355 | 5.888822 | 0.838485 | 1.167718 |
| 656 | unknown           | 0.037481 | 0.267019 | 0.060422 | 0.049968 |
| 657 | unknown           | 4.61E-07 | 4.95E-06 | 0.055653 | 1.16E-06 |
| 658 | unknown           | 4.61E-07 | 0.083711 | 0.023412 | 1.16E-06 |
| 659 | unknown           | 0.09569  | 8.034253 | 0.586984 | 1.16E-06 |
| 660 | unknown           | 0.082386 | 2.142886 | 0.075776 | 0.060875 |
| 661 | unknown           | 4.61E-07 | 4.95E-06 | 5.23E-07 | 1.16E-06 |
| 662 | unknown           | 0.115315 | 4.95E-06 | 5.23E-07 | 1.16E-06 |
| 663 | unknown           | 0.205608 | 6.059024 | 0.211109 | 0.056852 |
| 664 | unknown           | 0.00453  | 0.006294 | 0.002553 | 1.16E-06 |
| 665 | unknown           | 0.163488 | 1.275696 | 0.116948 | 0.249362 |
| 666 | unknown           | 0.089259 | 0.441991 | 0.074019 | 0.011891 |
| 667 | unknown           | 4.61E-07 | 4.410193 | 0.478043 | 1.16E-06 |
| 668 | unknown           | 4.61E-07 | 4.95E-06 | 5.23E-07 | 0.00033  |
| 669 | Total metabolites | 353      | 4220     | 399      | 753      |

S1, silage collected from Erdos; S2, silage collected from Baotou; S3, silage collected from



Ulaqab; S4, silage collected from Hohhot.

**Supplementary Table S2.** Difference in metabolites identified between S1 and S2 (n = 3).

| No. | Items                         | P-value  | Log <sub>2</sub> (S2/S1) | S1       | S2       |
|-----|-------------------------------|----------|--------------------------|----------|----------|
| 1   | valine                        | 0.039489 | 28.72841                 | 4.61E-07 | 205.1862 |
| 2   | L-Allothreonine 1             | 0.03432  | 26.17418                 | 4.61E-07 | 34.934   |
| 3   | hydroxylamine                 | 0.036736 | 26.04365                 | 4.61E-07 | 31.91204 |
| 4   | Galactonic acid               | 0.032625 | 25.57156                 | 4.61E-07 | 23.00615 |
| 5   | 3-Methyloxindole 2            | 0.002105 | 23.06212                 | 4.61E-07 | 4.040427 |
| 6   | maleic acid                   | 0.039731 | 21.52869                 | 4.61E-07 | 1.395783 |
| 7   | asparagine 4                  | 0.001266 | 21.46458                 | 4.61E-07 | 1.33511  |
| 8   | Cholesterol-2,2,3,4,4,6-d6    | 0.020961 | 20.54578                 | 4.61E-07 | 0.706205 |
| 9   | N-Acetyltryptophan 2          | 0.001465 | 19.30544                 | 4.61E-07 | 0.298919 |
| 10  | alpha-ketoisocaproic acid 1   | 0.019472 | 18.43975                 | 4.61E-07 | 0.164041 |
| 11  | 9-Fluorenone 1                | 0.034018 | 18.29968                 | 4.61E-07 | 0.148864 |
| 12  | Lactamide 1                   | 0.041127 | 16.73342                 | 4.61E-07 | 0.050269 |
| 13  | Cytosin                       | 0.005046 | 8.100119                 | 0.002171 | 0.595746 |
| 14  | 2-methylfumarate              | 0.023211 | 7.295847                 | 0.001984 | 0.311772 |
| 15  | thymine                       | 0.028792 | 6.741279                 | 0.041842 | 4.476471 |
| 16  | Itaconic acid                 | 0.029103 | 6.67046                  | 0.046388 | 4.725149 |
| 17  | urea                          | 0.035336 | 6.669142                 | 0.005818 | 0.592055 |
| 18  | L-Threose 1                   | 0.018979 | 6.264232                 | 0.004739 | 0.364254 |
| 19  | TES                           | 0.009294 | 6.094906                 | 0.022621 | 1.546155 |
| 20  | Glucosaminic acid             | 0.029358 | 6.00603                  | 0.001134 | 0.072911 |
| 21  | myo-inositol                  | 0.026461 | 5.975298                 | 1.049071 | 66.00075 |
| 22  | serine 1                      | 0.033248 | 5.834187                 | 3.026524 | 172.667  |
| 23  | flavin adenine degrad product | 0.005085 | 5.83191                  | 0.595948 | 33.94597 |
| 24  | Aminomalonic acid             | 0.005878 | 5.753982                 | 0.020107 | 1.085123 |
| 25  | Isoleucine                    | 0.044369 | 5.65023                  | 2.300765 | 115.5476 |
| 26  | N-Acetyl-beta-D-mannosamine 1 | 0.008067 | 5.640019                 | 0.053758 | 2.680742 |
| 27  | naringenin 3                  | 0.037288 | 5.136236                 | 0.017145 | 0.602959 |
| 28  | alanine 1                     | 0.035175 | 4.980197                 | 9.54671  | 301.33   |
| 29  | O-acetylserine 1              | 0.033493 | 4.916596                 | 0.00232  | 0.070067 |
| 30  | Threitol                      | 0.004857 | 4.680692                 | 0.041103 | 1.05414  |
| 31  | ribose                        | 0.000243 | 4.304549                 | 0.483194 | 9.548173 |
| 32  | oxalacetic acid               | 0.010027 | 4.236165                 | 0.043286 | 0.815758 |
| 33  | Pyrrole-2-Carboxylic Acid     | 0.047157 | 4.233486                 | 0.05769  | 1.085184 |
| 34  | Lyxose 1                      | 0.002264 | 4.200101                 | 6.473776 | 118.991  |
| 35  | Cortexolone 3                 | 0.037206 | 4.146499                 | 0.022043 | 0.390379 |
| 36  | beta-Mannosylglycerate 1      | 0.004533 | 3.952946                 | 0.230548 | 3.570403 |
| 37  | 2-Deoxyerythritol             | 0.043963 | 3.902026                 | 0.230995 | 3.453264 |
| 38  | D-Glyceric acid               | 0.036497 | 3.88746                  | 2.114059 | 31.28666 |
| 39  | glutathione 1                 | 0.008643 | 3.850086                 | 0.166919 | 2.407114 |
| 40  | palmitoleic acid              | 0.013054 | 3.808396                 | 0.050241 | 0.703877 |

|    |                                             |          |          |          |          |
|----|---------------------------------------------|----------|----------|----------|----------|
| 41 | 2-deoxy-D-glucose 1                         | 0.019459 | 3.742222 | 0.249277 | 3.335831 |
| 42 | Ribonic acid, gamma-lactone                 | 0.000265 | 3.733735 | 0.147476 | 1.961942 |
| 43 | linolenic acid                              | 0.010168 | 3.675551 | 0.792496 | 10.12624 |
| 44 | D-Arabitol                                  | 0.001009 | 3.668299 | 0.053312 | 0.677788 |
| 45 | Phytol                                      | 0.01936  | 3.665297 | 0.246715 | 3.130116 |
| 46 | methionine sulfoxide 2                      | 0.03649  | 3.646312 | 0.03622  | 0.453515 |
| 47 | Carbobenzyloxy-L-leucine degr2              | 0.003876 | 3.623344 | 0.018745 | 0.231009 |
| 48 | 2-hydroxypyridine                           | 0.044511 | 3.557747 | 2.91273  | 34.29957 |
| 49 | palmitic acid                               | 0.048839 | 3.550694 | 13.6459  | 159.907  |
| 50 | Arachidic acid                              | 0.045423 | 3.510235 | 0.064011 | 0.72936  |
| 51 | 3-Aminoisobutyric acid 1                    | 0.018967 | 3.46563  | 0.052562 | 0.580673 |
| 52 | 3-Phenyllactic acid                         | 0.002714 | 3.383977 | 0.583001 | 6.086227 |
| 53 | Gallic acid                                 | 0.042372 | 3.382755 | 0.038917 | 0.405927 |
| 54 | 4-Hydroxy-6-methyl-2-pyrone                 | 0.028153 | 3.370821 | 0.158002 | 1.634483 |
| 55 | Acetol 5                                    | 0.011475 | 3.35748  | 0.089322 | 0.915504 |
| 56 | 3-hydroxy-3-methylglutaric acid             | 0.001981 | 3.340309 | 0.094582 | 0.957947 |
| 57 | N-Methyl-L-glutamic acid 3                  | 0.017018 | 3.328852 | 0.080545 | 0.809325 |
| 58 | Guanidinosuccinic acid 3                    | 0.041406 | 3.31696  | 0.067585 | 0.673529 |
| 59 | beta-Alanine 2                              | 0.017505 | 3.310645 | 0.115815 | 1.149125 |
| 60 | fucose 1                                    | 0.000267 | 3.281423 | 0.445582 | 4.332457 |
| 61 | Glutaconic acid                             | 0.038938 | 3.181506 | 0.011287 | 0.102405 |
| 62 | phenylethylamine                            | 0.002263 | 3.173567 | 0.089086 | 0.8038   |
| 63 | tyrosine 1                                  | 0.048158 | 3.143343 | 2.343945 | 20.71037 |
| 64 | Aminoxyacetic acid                          | 0.040108 | 3.12062  | 0.004218 | 0.036683 |
| 65 | cis-gondoic acid                            | 0.003385 | 3.112386 | 0.095304 | 0.824198 |
| 66 | Diglycerol 1                                | 0.00202  | 3.083401 | 0.097607 | 0.827328 |
| 67 | Zymosterol 1                                | 0.047573 | 3.079106 | 0.100102 | 0.845955 |
| 68 | Aldosterone 1                               | 0.021732 | 3.057488 | 0.00909  | 0.075675 |
| 69 | 4-hydroxy-3-methoxybenzoic acid;            | 0.019362 | 3.031647 | 0.180251 | 1.473987 |
| 70 | heptadecanoic acid                          | 0.009474 | 3.028018 | 0.044748 | 0.365007 |
| 71 | ferulic acid                                | 0.026834 | 3.000825 | 1.308238 | 10.47189 |
| 72 | oxoproline                                  | 0.003778 | 2.994683 | 25.25126 | 201.267  |
| 73 | spermidine 1                                | 0.01268  | 2.984236 | 0.065491 | 0.518237 |
| 74 | guanine 1                                   | 0.009181 | 2.961242 | 0.218782 | 1.703861 |
| 75 | xylitol                                     | 0.000105 | 2.957449 | 0.29125  | 2.262283 |
| 76 | 4-Hydroxymethyl-3-methoxyphenoxyacetic acid | 0.03672  | 2.95703  | 0.143883 | 1.117287 |
| 77 | Ergosterol                                  | 0.026428 | 2.936855 | 0.178408 | 1.366139 |
| 78 | aspartic acid 1                             | 0.000563 | 2.811186 | 2.303451 | 16.16703 |
| 79 | 4-Hydroxycyclohexanecarboxylic acid         | 0.003931 | 2.792842 | 0.068491 | 0.474637 |
| 80 | Flavanone 1                                 | 0.008335 | 2.722379 | 0.011237 | 0.074157 |
| 81 | 2-aminophenol 2                             | 0.006682 | 2.694294 | 0.050778 | 0.328657 |
| 82 | phenylalanine 1                             | 0.004643 | 2.640931 | 26.4122  | 164.7419 |

|     |                                       |          |          |          |          |
|-----|---------------------------------------|----------|----------|----------|----------|
| 83  | Threonic acid                         | 0.001437 | 2.629834 | 0.059825 | 0.370292 |
| 84  | p-Anisic acid                         | 0.014453 | 2.605916 | 0.056243 | 0.342397 |
| 85  | 2-hydroxy-3-isopropylbutanedioic acid | 0.001342 | 2.589735 | 0.213591 | 1.285793 |
| 86  | 4-Hydroxybenzoic acid                 | 0.000195 | 2.582878 | 0.239734 | 1.436326 |
| 87  | 6-phosphogluconic acid                | 0.004406 | 2.556394 | 0.046828 | 0.275461 |
| 88  | Elaidic acid                          | 0.000555 | 2.460794 | 0.06226  | 0.342754 |
| 89  | 4-aminobutyric acid 1                 | 0.013062 | 2.435346 | 41.047   | 222.0208 |
| 90  | 3,4-dihydroxycinnamic acid            | 0.025546 | 2.251229 | 0.211551 | 1.007169 |
| 91  | 4-Hydroxyphenylethanol                | 0.004372 | 2.188532 | 0.045263 | 0.206326 |
| 92  | uridine 2                             | 0.019661 | 2.179346 | 0.140781 | 0.637667 |
| 93  | Maleamate 2                           | 0.007519 | 2.145483 | 0.036516 | 0.161561 |
| 94  | Isomaltose 1                          | 0.026163 | -11.218  | 0.011779 | 4.95E-06 |
| 95  | conduritol b epoxide 2                | 0.031562 | -11.5527 | 0.014855 | 4.95E-06 |
| 96  | 2-hydroxybutanoic acid                | 0.009979 | -12.3901 | 0.026544 | 4.95E-06 |
| 97  | 1,3-diaminopropane                    | 0.014332 | -12.4654 | 0.027967 | 4.95E-06 |
| 98  | Phenyl beta-D-glucopyranoside         | 0.013721 | -12.8733 | 0.037104 | 4.95E-06 |
| 99  | 4-hydroxyphenylacetic acid            | 3.92E-05 | -13.1001 | 0.043421 | 4.95E-06 |
| 100 | pentadecanoic acid                    | 0.016551 | -13.2473 | 0.048084 | 4.95E-06 |
| 101 | 3,6-Anhydro-D-galactose 3             | 0.003334 | -13.3344 | 0.051077 | 4.95E-06 |
| 102 | glucose-6-phosphate 1                 | 0.003226 | -14.0818 | 0.085744 | 4.95E-06 |
| 103 | N-alpha-Acetyl-L-ornithine 1          | 0.036943 | -14.1499 | 0.089891 | 4.95E-06 |
| 104 | sulfuric acid                         | 0.014966 | -15.8331 | 0.288671 | 4.95E-06 |

S1, silage collected from Erdos; S2, silage collected from Baotou.

**Supplementary Table S3.** Difference in metabolites identified between S2 and S3 (n = 3).

| No. | Items                                       | P-value  | Log <sub>2</sub> (S3/S2) | S2       | S3       |
|-----|---------------------------------------------|----------|--------------------------|----------|----------|
| 1   | indole-3-acetic acid                        | 0.048006 | -20.209                  | 0.633308 | 5.23E-07 |
| 2   | xanthine                                    | 0.011565 | -19.7458                 | 0.45939  | 5.23E-07 |
| 3   | Aminooxyacetic acid                         | 0.027635 | -6.84146                 | 0.036683 | 0.00032  |
| 4   | 9-Fluorenone 1                              | 0.034984 | -6.82466                 | 0.148864 | 0.001313 |
| 5   | Galactonic acid                             | 0.033546 | -6.78189                 | 23.00615 | 0.20907  |
| 6   | maleic acid                                 | 0.040963 | -6.66525                 | 1.395783 | 0.013752 |
| 7   | palmitoleic acid                            | 0.010717 | -5.54063                 | 0.703877 | 0.015122 |
| 8   | Pyrrole-2-Carboxylic Acid                   | 0.04294  | -5.46688                 | 1.085184 | 0.024536 |
| 9   | Aminomalonic acid                           | 0.006067 | -5.03305                 | 1.085123 | 0.033142 |
| 10  | 4-Hydroxymethyl-3-methoxyphenoxyacetic acid | 0.02574  | -5.02107                 | 1.117287 | 0.034409 |
| 11  | Itaconic acid                               | 0.032604 | -4.44787                 | 4.725149 | 0.216507 |
| 12  | 3-Phenyllactic acid                         | 0.002219 | -4.29132                 | 6.086227 | 0.310837 |
| 13  | oxalacetic acid                             | 0.010035 | -4.25079                 | 0.815758 | 0.04285  |
| 14  | 2-methylfumarate                            | 0.027252 | -4.21232                 | 0.311772 | 0.016819 |
| 15  | aspartic acid 1                             | 0.000233 | -4.08328                 | 16.16703 | 0.953763 |
| 16  | palmitic acid                               | 0.044955 | -4.03899                 | 159.907  | 9.727686 |
| 17  | Ribonic acid, gamma-lactone                 | 0.000253 | -3.95852                 | 1.961942 | 0.126198 |
| 18  | asparagine 4                                | 0.001654 | -3.94802                 | 1.33511  | 0.086506 |
| 19  | Threitol                                    | 0.004987 | -3.90457                 | 1.05414  | 0.070389 |
| 20  | 5-Dihydrocortisol 1                         | 0.030324 | -3.81595                 | 0.193368 | 0.01373  |
| 21  | phenylethylamine                            | 0.001791 | -3.8131                  | 0.8038   | 0.057186 |
| 22  | urea                                        | 0.04327  | -3.7671                  | 0.592055 | 0.043486 |
| 23  | glycerol                                    | 0.046414 | -3.7547                  | 179.8441 | 13.32352 |
| 24  | TES                                         | 0.011704 | -3.70595                 | 1.546155 | 0.118482 |
| 25  | methionine sulfoxide 2                      | 0.03608  | -3.69897                 | 0.453515 | 0.034921 |
| 26  | 4-aminobutyric acid 1                       | 0.007786 | -3.69626                 | 222.0208 | 17.12807 |
| 27  | fucose 1                                    | 0.000237 | -3.6938                  | 4.332457 | 0.334804 |
| 28  | Guanidinosuccinic acid 3                    | 0.037956 | -3.68445                 | 0.673529 | 0.052387 |
| 29  | Gentiobiose 2                               | 0.043003 | -3.66567                 | 0.914126 | 0.072033 |
| 30  | Threonic acid                               | 0.000711 | -3.66476                 | 0.370292 | 0.029197 |
| 31  | Cerotinic acid                              | 0.049658 | -3.6377                  | 0.285615 | 0.022947 |
| 32  | D-Glyceric acid                             | 0.038016 | -3.63222                 | 31.28666 | 2.523198 |
| 33  | N-Methyl-L-glutamic acid 3                  | 0.015522 | -3.62084                 | 0.809325 | 0.065787 |
| 34  | linolenic acid                              | 0.009799 | -3.6172                  | 10.12624 | 0.825207 |
| 35  | uracil                                      | 0.047058 | -3.60817                 | 36.98003 | 3.032498 |
| 36  | Lyxose 1                                    | 0.00253  | -3.59915                 | 118.991  | 9.818863 |
| 37  | hydroxylamine                               | 0.047377 | -3.59693                 | 31.91204 | 2.637362 |
| 38  | beta-Mannosylglycerate 1                    | 0.004774 | -3.58483                 | 3.570403 | 0.297561 |
| 39  | 4-Hydroxy-6-methyl-2-pyrone                 | 0.026806 | -3.57967                 | 1.634483 | 0.136708 |
| 40  | xylitol                                     | 8.55E-05 | -3.56119                 | 2.262283 | 0.191655 |

|    |                                       |          |          |          |          |
|----|---------------------------------------|----------|----------|----------|----------|
| 41 | 3-Aminoisobutyric acid 1              | 0.018691 | -3.51153 | 0.580673 | 0.050916 |
| 42 | p-Anisic acid                         | 0.010244 | -3.50153 | 0.342397 | 0.030232 |
| 43 | benzoic acid                          | 0.047748 | -3.48985 | 0.53364  | 0.047501 |
| 44 | Cholesterol-2,2,3,4,4,6-d6            | 0.02853  | -3.48889 | 0.706205 | 0.062903 |
| 45 | ribose                                | 0.00029  | -3.45881 | 9.548173 | 0.86839  |
| 46 | 3-hydroxy-3-methylglutaric acid       | 0.001901 | -3.4549  | 0.957947 | 0.08736  |
| 47 | Gallic acid                           | 0.041522 | -3.45302 | 0.405927 | 0.037067 |
| 48 | d-Glucoheptose 1                      | 0.008465 | -3.4441  | 2.012425 | 0.184902 |
| 49 | L-homoserine 1                        | 0.014613 | -3.4381  | 0.288567 | 0.026624 |
| 50 | phenylalanine 1                       | 0.003382 | -3.43004 | 164.7419 | 15.28482 |
| 51 | Maleamate 2                           | 0.00277  | -3.42594 | 0.161561 | 0.015032 |
| 52 | methionine 1                          | 0.002086 | -3.41994 | 20.18796 | 1.886207 |
| 53 | 24,25-dihydrolanosterol               | 0.047995 | -3.40701 | 3.402826 | 0.320795 |
| 54 | 2-Furoic Acid                         | 0.047985 | -3.38303 | 1.896762 | 0.18181  |
| 55 | Zymosterol 1                          | 0.044365 | -3.36998 | 0.845955 | 0.081824 |
| 56 | 3-Methylamino-1,2-propanediol 2       | 0.044717 | -3.35342 | 1.348409 | 0.13193  |
| 57 | heptadecanoic acid                    | 0.007694 | -3.35208 | 0.365007 | 0.035746 |
| 58 | oxoproline                            | 0.003176 | -3.34514 | 201.267  | 19.80546 |
| 59 | naringenin 3                          | 0.046719 | -3.28295 | 0.602959 | 0.061947 |
| 60 | L-Threose 1                           | 0.026549 | -3.27008 | 0.364254 | 0.037758 |
| 61 | 2-hydroxypyridine                     | 0.047353 | -3.26797 | 34.29957 | 3.560669 |
| 62 | ribitol                               | 0.046099 | -3.23409 | 142.7521 | 15.17133 |
| 63 | ferulic acid                          | 0.024179 | -3.21759 | 10.47189 | 1.125726 |
| 64 | alanine 1                             | 0.044425 | -3.20912 | 301.33   | 32.58378 |
| 65 | 2-hydroxy-3-isopropylbutanedioic acid | 0.000816 | -3.1954  | 1.285793 | 0.140366 |
| 66 | glycolic acid                         | 0.049025 | -3.19487 | 5.111301 | 0.558188 |
| 67 | 3-Methyloxindole 2                    | 0.003256 | -3.18251 | 4.040427 | 0.445038 |
| 68 | 4-hydroxy-3-methoxybenzoic acid;      | 0.018384 | -3.17691 | 1.473987 | 0.162985 |
| 69 | Acetol 5                              | 0.012164 | -3.1541  | 0.915504 | 0.102845 |
| 70 | beta-Alanine 2                        | 0.018415 | -3.14754 | 1.149125 | 0.129677 |
| 71 | glycine 1                             | 0.048533 | -3.13834 | 1.059744 | 0.120356 |
| 72 | Carbobenzyloxy-L-leucine degr2        | 0.004758 | -3.11621 | 0.231009 | 0.026641 |
| 73 | Cytosin                               | 0.007921 | -3.06339 | 0.595746 | 0.071267 |
| 74 | 2-deoxy-D-glucose 1                   | 0.022676 | -3.0568  | 3.335831 | 0.400882 |
| 75 | myo-inositol                          | 0.037512 | -3.04834 | 66.00075 | 7.978255 |
| 76 | Phytol                                | 0.022077 | -3.02357 | 3.130116 | 0.384924 |
| 77 | Ergosterol                            | 0.025835 | -3.02086 | 1.366139 | 0.168316 |
| 78 | phenylalanine 2                       | 0.010117 | -3.01919 | 6.990973 | 0.862326 |
| 79 | 4-Hydroxycyclohexanecarboxylic acid   | 0.003427 | -3.01793 | 0.474637 | 0.058597 |
| 80 | guanine 1                             | 0.008391 | -2.9633  | 1.703861 | 0.218471 |
| 81 | Aldosterone 1                         | 0.022521 | -2.95494 | 0.075675 | 0.009759 |
| 82 | aspartic acid 2                       | 0.004886 | -2.89531 | 0.726306 | 0.097621 |

|     |                               |          |          |          |          |
|-----|-------------------------------|----------|----------|----------|----------|
| 83  | N-Acetyl-beta-D-mannosamine 1 | 0.012543 | -2.87363 | 2.680742 | 0.365767 |
| 84  | Isoleucine                    | 0.039297 | -2.75897 | 4.419154 | 0.652842 |
| 85  | glutaraldehyde 2              | 0.04306  | -2.74129 | 16.48865 | 2.465888 |
| 86  | N-Carbamylglutamate 4         | 0.022267 | -2.73764 | 0.176804 | 0.026508 |
| 87  | glutathione 1                 | 0.011517 | -2.73398 | 2.407114 | 0.361814 |
| 88  | gentisic acid                 | 0.019485 | -2.71932 | 0.171846 | 0.026094 |
| 89  | D-Arabitol                    | 0.001534 | -2.67404 | 0.677788 | 0.106201 |
| 90  | stearic acid                  | 0.000326 | -2.65699 | 12.43215 | 1.971117 |
| 91  | Flavanone 1                   | 0.007786 | -2.59484 | 0.074157 | 0.012275 |
| 92  | 3-Methylglutaric Acid         | 0.032554 | -2.5618  | 0.563409 | 0.095421 |
| 93  | spermidine 1                  | 0.016204 | -2.52728 | 0.518237 | 0.089896 |
| 94  | 1-Indanone 2                  | 0.018389 | -2.49073 | 1.85087  | 0.3293   |
| 95  | serine 2                      | 0.044988 | -2.47361 | 6.908027 | 1.243724 |
| 96  | uridine 2                     | 0.01924  | -2.41875 | 0.637667 | 0.119255 |
| 97  | Diglycerol 1                  | 0.002841 | -2.37412 | 0.827328 | 0.159587 |
| 98  | cis-gondoic acid              | 0.005998 | -2.34934 | 0.824198 | 0.161738 |
| 99  | valine                        | 0.032339 | -2.30293 | 11.69505 | 2.370012 |
| 100 | Elaidic acid                  | 0.000248 | -2.12697 | 0.342754 | 0.07847  |
| 101 | 4-Hydroxyphenylethanol        | 0.004993 | -2.03011 | 0.206326 | 0.050516 |
| 102 | 6-phosphogluconic acid        | 0.011456 | -1.78054 | 0.275461 | 0.08018  |
| 103 | 3,4-dihydroxycinnamic acid    | 0.032564 | -1.74417 | 1.007169 | 0.300646 |
| 104 | Isomaltose 1                  | 0.007811 | 8.937706 | 4.95E-06 | 0.002425 |
| 105 | 3,6-Anhydro-D-galactose 3     | 6.55E-06 | 11.4177  | 4.95E-06 | 0.013528 |
| 106 | thymidine 1                   | 0.015765 | 12.33314 | 4.95E-06 | 0.025516 |
| 107 | 2-hydroxybutanoic acid        | 0.000758 | 12.74225 | 4.95E-06 | 0.033882 |
| 108 | N-alpha-Acetyl-L-ornithine 1  | 0.0087   | 14.50185 | 4.95E-06 | 0.114727 |
| 109 | Dihydroxyacetone              | 0.014271 | 15.35385 | 4.95E-06 | 0.207082 |
| 110 | sulfuric acid                 | 0.006652 | 15.77171 | 4.95E-06 | 0.276651 |
| 111 | 4-hydroxybutyrate             | 0.008987 | 15.86188 | 4.95E-06 | 0.294492 |

S2, silage collected from Baotou; S3, silage collected from Ulanqab.

**Supplementary Table S4.** Difference in metabolites identified between S2 and S4 (n = 3).

| No. | Items                                       | P-value  | Log <sub>2</sub> (S4/S2) | S2       | S4       |
|-----|---------------------------------------------|----------|--------------------------|----------|----------|
| 1   | alanine 1                                   | 0.031381 | -27.954                  | 301.33   | 1.16E-06 |
| 2   | ribitol                                     | 0.032994 | -26.8762                 | 142.7521 | 1.16E-06 |
| 3   | Lyxose 1                                    | 0.001831 | -26.6135                 | 118.991  | 1.16E-06 |
| 4   | D-Glyceric acid                             | 0.029152 | -24.6863                 | 31.28666 | 1.16E-06 |
| 5   | methionine 1                                | 0.001414 | -24.0542                 | 20.18796 | 1.16E-06 |
| 6   | 4-hydroxycinnamic acid                      | 0.040819 | -22.6896                 | 7.839479 | 1.16E-06 |
| 7   | 5-aminovaleric acid lactam                  | 0.043008 | -22.5918                 | 7.325618 | 1.16E-06 |
| 8   | maleic acid                                 | 0.039731 | -20.1999                 | 1.395783 | 1.16E-06 |
| 9   | 3-Methylamino-1,2-propanediol 2             | 0.032305 | -20.1501                 | 1.348409 | 1.16E-06 |
| 10  | 4-Hydroxymethyl-3-methoxyphenoxyacetic acid | 0.023305 | -19.8788                 | 1.117287 | 1.16E-06 |
| 11  | glycine 1                                   | 0.033892 | -19.8025                 | 1.059744 | 1.16E-06 |
| 12  | cis-gondoic acid                            | 0.002059 | -19.4399                 | 0.824198 | 1.16E-06 |
| 13  | spermidine 1                                | 0.006992 | -18.7705                 | 0.518237 | 1.16E-06 |
| 14  | 4-Hydroxycyclohexanecarboxylic acid         | 0.00178  | -18.6437                 | 0.474637 | 1.16E-06 |
| 15  | Gallic acid                                 | 0.031055 | -18.4181                 | 0.405927 | 1.16E-06 |
| 16  | L-Threose 1                                 | 0.018106 | -18.2618                 | 0.364254 | 1.16E-06 |
| 17  | N-Acetyltryptophan 2                        | 0.001465 | -17.9766                 | 0.298919 | 1.16E-06 |
| 18  | 6-phosphogluconic acid                      | 0.001905 | -17.8587                 | 0.275461 | 1.16E-06 |
| 19  | mucic acid                                  | 0.033774 | -17.7487                 | 0.255227 | 1.16E-06 |
| 20  | N-Carbamylglutamate 4                       | 0.012926 | -17.219                  | 0.176804 | 1.16E-06 |
| 21  | gentisic acid                               | 0.011179 | -17.178                  | 0.171846 | 1.16E-06 |
| 22  | arachidonic acid                            | 0.000754 | -17.1689                 | 0.170764 | 1.16E-06 |
| 23  | alpha-ketoisocaproic acid 1                 | 0.019473 | -17.111                  | 0.164041 | 1.16E-06 |
| 24  | palatinitol 2                               | 0.03806  | -17.0725                 | 0.159732 | 1.16E-06 |
| 25  | Corticosterone 4                            | 0.016419 | -16.2926                 | 0.093023 | 1.16E-06 |
| 26  | Pelargonic acid                             | 0.039914 | -15.9304                 | 0.072371 | 1.16E-06 |
| 27  | flavin adenine degrad product               | 0.004961 | -6.71332                 | 33.94597 | 0.323502 |
| 28  | ferulic acid                                | 0.017481 | -6.11596                 | 10.47189 | 0.150986 |
| 29  | tyrosine 1                                  | 0.035031 | -6.06819                 | 20.71037 | 0.30866  |
| 30  | O-acetylserine 1                            | 0.031292 | -5.97485                 | 0.070067 | 0.001114 |
| 31  | ribose                                      | 0.000246 | -5.58705                 | 9.548173 | 0.198633 |
| 32  | Pyrrole-2-Carboxylic Acid                   | 0.042876 | -5.4948                  | 1.085184 | 0.024066 |
| 33  | 2-Deoxyerythritol                           | 0.038783 | -5.1199                  | 3.453264 | 0.099309 |
| 34  | 2-aminophenol 2                             | 0.00296  | -5.07234                 | 0.328657 | 0.009768 |
| 35  | Cholesterol-2,2,3,4,4,6-d6                  | 0.023826 | -4.95271                 | 0.706205 | 0.022804 |
| 36  | glutathione 1                               | 0.0073   | -4.75417                 | 2.407114 | 0.089197 |
| 37  | Aldosterone 1                               | 0.016642 | -4.66455                 | 0.075675 | 0.002984 |
| 38  | Aminooxyacetic acid                         | 0.030773 | -4.60357                 | 0.036683 | 0.001509 |
| 39  | 3-Cyanoalanine                              | 0.046751 | -4.04353                 | 0.539866 | 0.032739 |
| 40  | D-erythro-sphingosine 1                     | 0.043933 | -3.93946                 | 0.042397 | 0.002763 |



|    |                                 |          |          |          |          |
|----|---------------------------------|----------|----------|----------|----------|
| 41 | benzoic acid                    | 0.044898 | -3.82966 | 0.53364  | 0.037532 |
| 42 | 3,4-dihydroxycinnamic acid      | 0.01246  | -3.64261 | 1.007169 | 0.080643 |
| 43 | N-Acetyl-beta-D-mannosamine 1   | 0.010433 | -3.4369  | 2.680742 | 0.247539 |
| 44 | uracil                          | 0.048767 | -3.39414 | 36.98003 | 3.517458 |
| 45 | Cytosin                         | 0.007216 | -3.35464 | 0.595746 | 0.058239 |
| 46 | linolenic acid                  | 0.011168 | -3.24441 | 10.12624 | 1.068522 |
| 47 | trans-sinapinic acid            | 0.005994 | -2.91658 | 0.457084 | 0.060537 |
| 48 | Galactonic acid                 | 0.049748 | -2.91347 | 23.00615 | 3.053524 |
| 49 | xanthine                        | 0.019166 | -2.90436 | 0.45939  | 0.061359 |
| 50 | serine 2                        | 0.038063 | -2.73599 | 6.908027 | 1.036904 |
| 51 | d-Glucoheptose 1                | 0.01113  | -2.58897 | 2.012425 | 0.334474 |
| 52 | N-Methyl-L-glutamic acid 3      | 0.022718 | -2.50103 | 0.809325 | 0.142968 |
| 53 | D-Arabitol                      | 0.00653  | -2.41721 | 0.677788 | 0.126894 |
| 54 | myo-inositol                    | 0.049556 | -2.30248 | 66.00075 | 13.37934 |
| 55 | aspartic acid 2                 | 0.012034 | -2.27912 | 0.726306 | 0.149636 |
| 56 | Ribonic acid, gamma-lactone     | 0.000502 | -2.22556 | 1.961942 | 0.419493 |
| 57 | heptadecanoic acid              | 0.012786 | -2.19526 | 0.365007 | 0.0797   |
| 58 | 3-Aminoisobutyric acid 1        | 0.032101 | -2.14938 | 0.580673 | 0.130889 |
| 59 | L-homoserine 1                  | 0.025701 | -2.10191 | 0.288567 | 0.067222 |
| 60 | phenylethylamine                | 0.003944 | -2.02109 | 0.8038   | 0.198033 |
| 61 | oxoproline                      | 0.006374 | -1.96903 | 201.267  | 51.40852 |
| 62 | Phytol                          | 0.046542 | -1.95584 | 3.130116 | 0.806849 |
| 63 | Flavanone 1                     | 0.011    | -1.95537 | 0.074157 | 0.019122 |
| 64 | Maleamate 2                     | 0.006049 | -1.90412 | 0.161561 | 0.043166 |
| 65 | guanine 1                       | 0.015381 | -1.85263 | 1.703861 | 0.471778 |
| 66 | Threonic acid                   | 0.001857 | -1.82516 | 0.370292 | 0.1045   |
| 67 | stearic acid                    | 0.000518 | -1.68376 | 12.43215 | 3.86976  |
| 68 | aspartic acid 1                 | 0.00138  | -1.55708 | 16.16703 | 5.494171 |
| 69 | p-Anisic acid                   | 0.030924 | -1.54695 | 0.342397 | 0.11718  |
| 70 | 3-hydroxy-3-methylglutaric acid | 0.006737 | -1.49292 | 0.957947 | 0.340352 |
| 71 | xylitol                         | 0.000395 | -1.42529 | 2.262283 | 0.842346 |
| 72 | Diglycerol 1                    | 0.00765  | -1.39585 | 0.827328 | 0.314401 |
| 73 | Threitol                        | 0.021896 | -1.33724 | 1.05414  | 0.417203 |
| 74 | Acetol 5                        | 0.044225 | -1.28622 | 0.915504 | 0.375379 |
| 75 | 3-Phenyllactic acid             | 0.012512 | -1.27275 | 6.086227 | 2.518906 |
| 76 | 4-Hydroxybenzoic acid           | 0.001059 | -1.11229 | 1.436326 | 0.664387 |
| 77 | fucose 1                        | 0.001955 | -1.10653 | 4.332457 | 2.01203  |
| 78 | phenylalanine 1                 | 0.021758 | -1.09883 | 164.7419 | 76.91741 |
| 79 | Elaidic acid                    | 0.000333 | -1.04243 | 0.342754 | 0.16641  |
| 80 | 3-Methyloxindole 2              | 0.027137 | -0.95251 | 4.040427 | 2.087826 |
| 81 | 4-Hydroxyphenylethanol          | 0.030076 | -0.81054 | 0.206326 | 0.11764  |
| 82 | 4-Acetylbutyric acid 1          | 0.003168 | 8.835112 | 4.95E-06 | 0.002258 |

|    |                            |          |          |          |          |
|----|----------------------------|----------|----------|----------|----------|
| 83 | N-Methyl-DL-alanine        | 0.011474 | 13.11946 | 4.95E-06 | 0.044007 |
| 84 | 2-hydroxybutanoic acid     | 0.000463 | 13.15075 | 4.95E-06 | 0.044972 |
| 85 | 4-hydroxyphenylacetic acid | 4.8E-07  | 14.9332  | 4.95E-06 | 0.154709 |
| 86 | N-Acetyl-L-leucine 2       | 0.042386 | 16.88099 | 4.95E-06 | 0.59684  |
| 87 | sulfuric acid              | 0.000214 | 16.92123 | 4.95E-06 | 0.613723 |
| 88 | trehalose                  | 0.000382 | 17.69199 | 4.95E-06 | 1.047115 |

S2, silage collected from Baotou; S4, silage collected from Hohhot.

**Supplementary Table S5.** Relative abundance of *Bacillus*, *Pseudomonas*, *Escherichia*, *Klebsiella*, and *Salmonella* in whole-plant corn silages (n = 3).

| Items              | S1        | S2        | S3        | S4        |
|--------------------|-----------|-----------|-----------|-----------|
| <i>Bacillus</i>    | 0.0000690 | 0.0109880 | 0.0005730 | 0.0000000 |
| <i>Pseudomonas</i> | 0.0057880 | 0.0081210 | 0.0023390 | 0.0001540 |
| <i>Escherichia</i> | 0.0010390 | 0.0004400 | 0.0001890 | 0         |
| <i>Klebsiella</i>  | 0.0003350 | 0.0002500 | 0.0001660 | 0.0000410 |
| <i>Salmonella</i>  | 0         | 0.0001180 | 0         | 0         |

S1, silage collected from Erdos; S2, silage collected from Baotou; S3, silage collected from Ulanqab; S4, silage collected from Hohhot.
